# Supplementary material for: Mechanistic investigations on six bacterial terpene cyclases
Source: publisher site journal article supplement (doi:10.3762/bjoc.12.173), 2016-08-15
Supplement: Additional file 1 [file 1860-5397-12-173-S1.pdf]

# **Supporting Information**

for

## **Mechanistic investigations on six bacterial terpene cyclases**

Patrick Rabe, Thomas Schmitz and Jeroen S. Dickschat\*

Address: Kekulé-Institute of Organic Chemistry and Biochemistry, University of Bonn,  
Gerhard-Domagk-Straße 1, 53121 Bonn, Germany

Email: Jeroen S. Dickschat - dickschat@uni-bonn.de

\* Corresponding author

## **Gas chromatograms of extracts from enzyme reactions and NMR spectra of compounds 1–5**

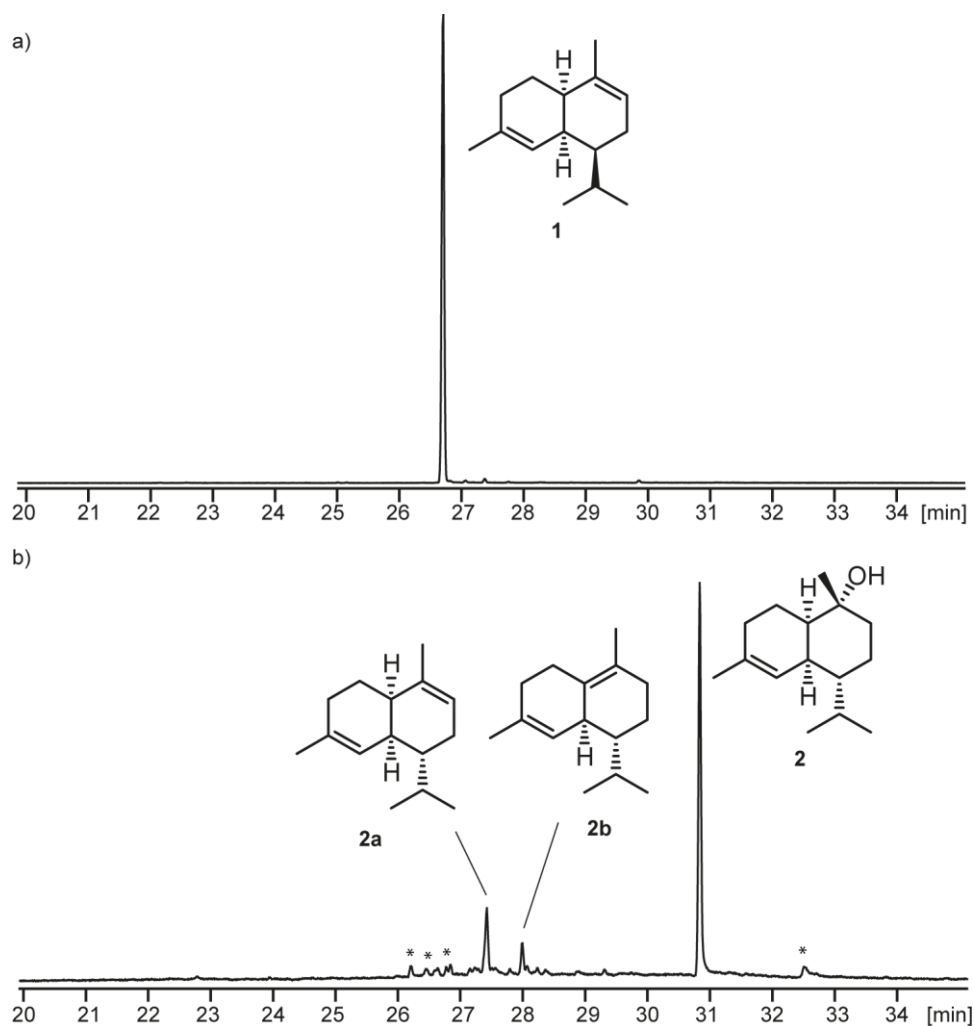

**Figure S1:** Total ion chromatograms of extracts from incubation experiments of FPP with a) (–)- $\alpha$ -amorphene synthase from *S. viridochromogenes* and b) (–)-7-*epi*- $\alpha$ -eudesmol synthase from *S. viridochromogenes*. Asterisks indicate unidentified compounds and contaminants such as plasticisers.

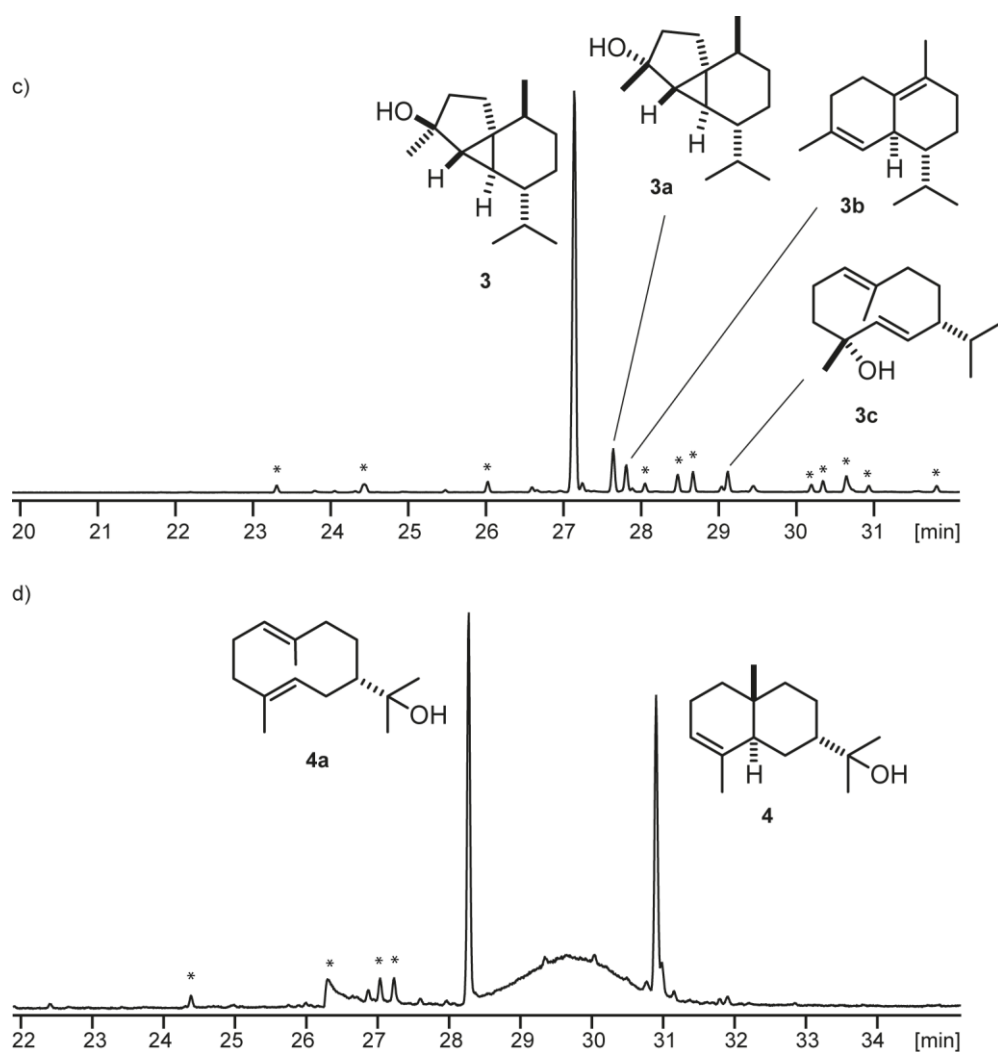

**Figure S1 (continued):** Total ion chromatograms of extracts from incubation experiments of FPP with c) (+)-T-muurolol synthase from *Roseiflexus castenholzii* and d) (+)-4-*epi*-cubebol synthase from *Streptosporangium roseum*. Asterisks indicate unidentified compounds and contaminants such as plasticisers.

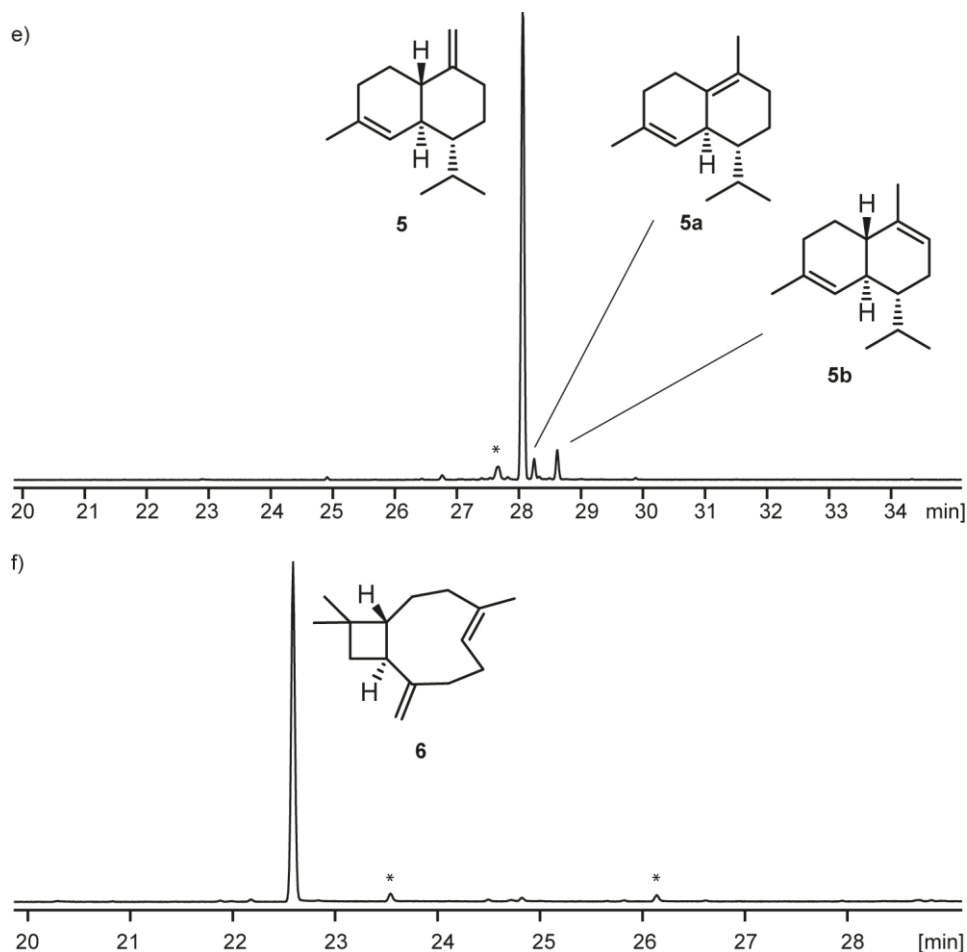

**Figure S1 (continued):** Total ion chromatograms of extracts from incubation experiments of FPP with e) (–)- $\gamma$ -cadinene synthase from *Chitinophaga pinensis* and f) (–)-(*E*)- $\beta$ -caryophyllene synthase from *Saccharothrix espanaensis*. Asterisks indicate unidentified compounds and contaminants such as plasticisers.

**Table S1:** Terpenes identified in hexane extracts of incubation experiments with FPP and recombinant purified terpene cyclases

| Compound <sup>[a]</sup>                                  | <i>I</i> <sup>[b]</sup> | <i>I</i> (Lit.) <sup>[c]</sup> |
|----------------------------------------------------------|-------------------------|--------------------------------|
| $\alpha$ -muurolene ( <b>2a</b> )                        | 1504                    | 1500                           |
| cubebol ( <b>3a</b> )                                    | 1517                    | 1514                           |
| $\delta$ -cadinene ( <b>2b</b> , <b>3b</b> , <b>5a</b> ) | 1523                    | 1520                           |
| $\alpha$ -cadinene ( <b>5b</b> )                         | 1546                    | 1539                           |
| hedycaryol ( <b>4a</b> )                                 | 1549                    | 1546                           |
| germacrene D-4-ol ( <b>3c</b> )                          | 1577                    | 1574                           |

[a] Compound numbers refer to numbers in Figure 1. [b] Measured retention index on a HP5-MS column (data for main compounds **1** – **6** are given in the main text). [c] Retention index on a HP5-MS column from: Adams, R. P. *Identification of Essential Oil Components by Gas Chromatography/ Mass Spectrometry*, Allured, Carol Stream, **2009**.



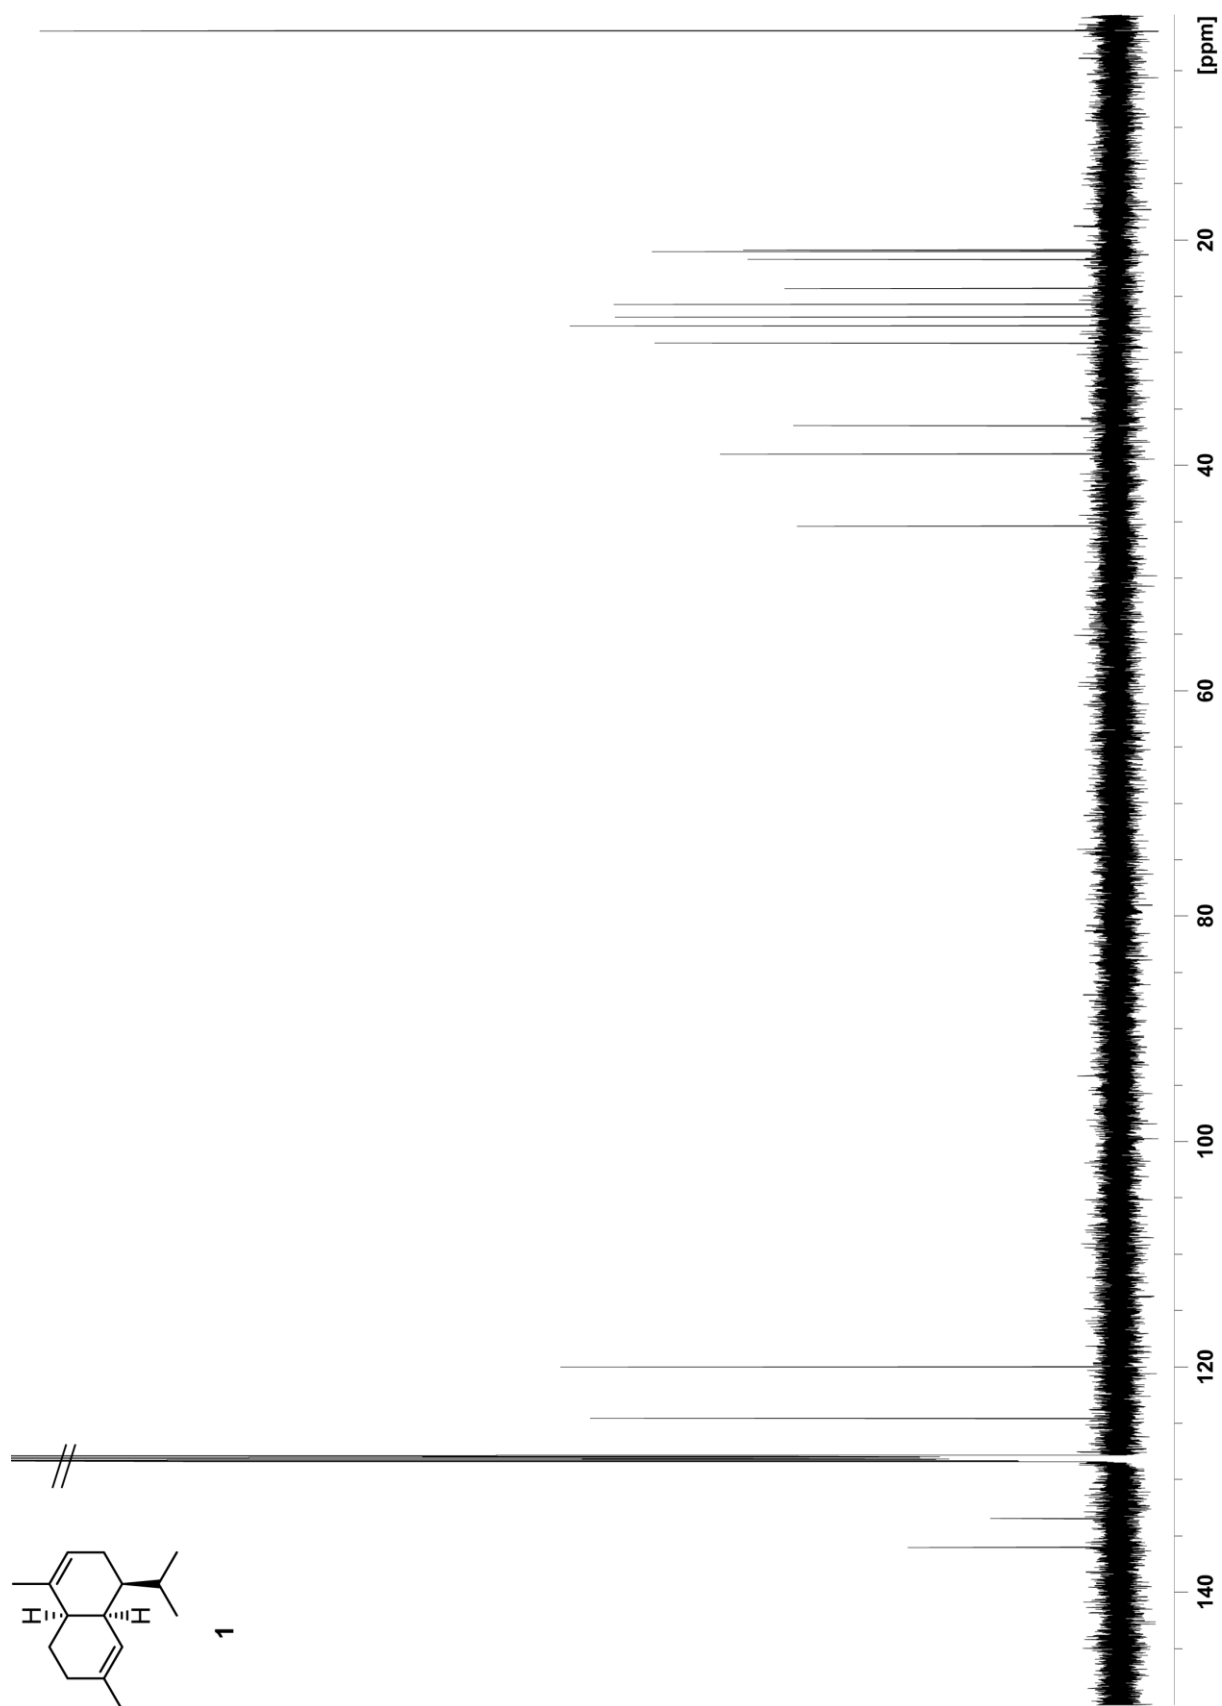

**Figure S3:**  $^{13}\text{C}$  NMR spectrum of **1** at 125 MHz.

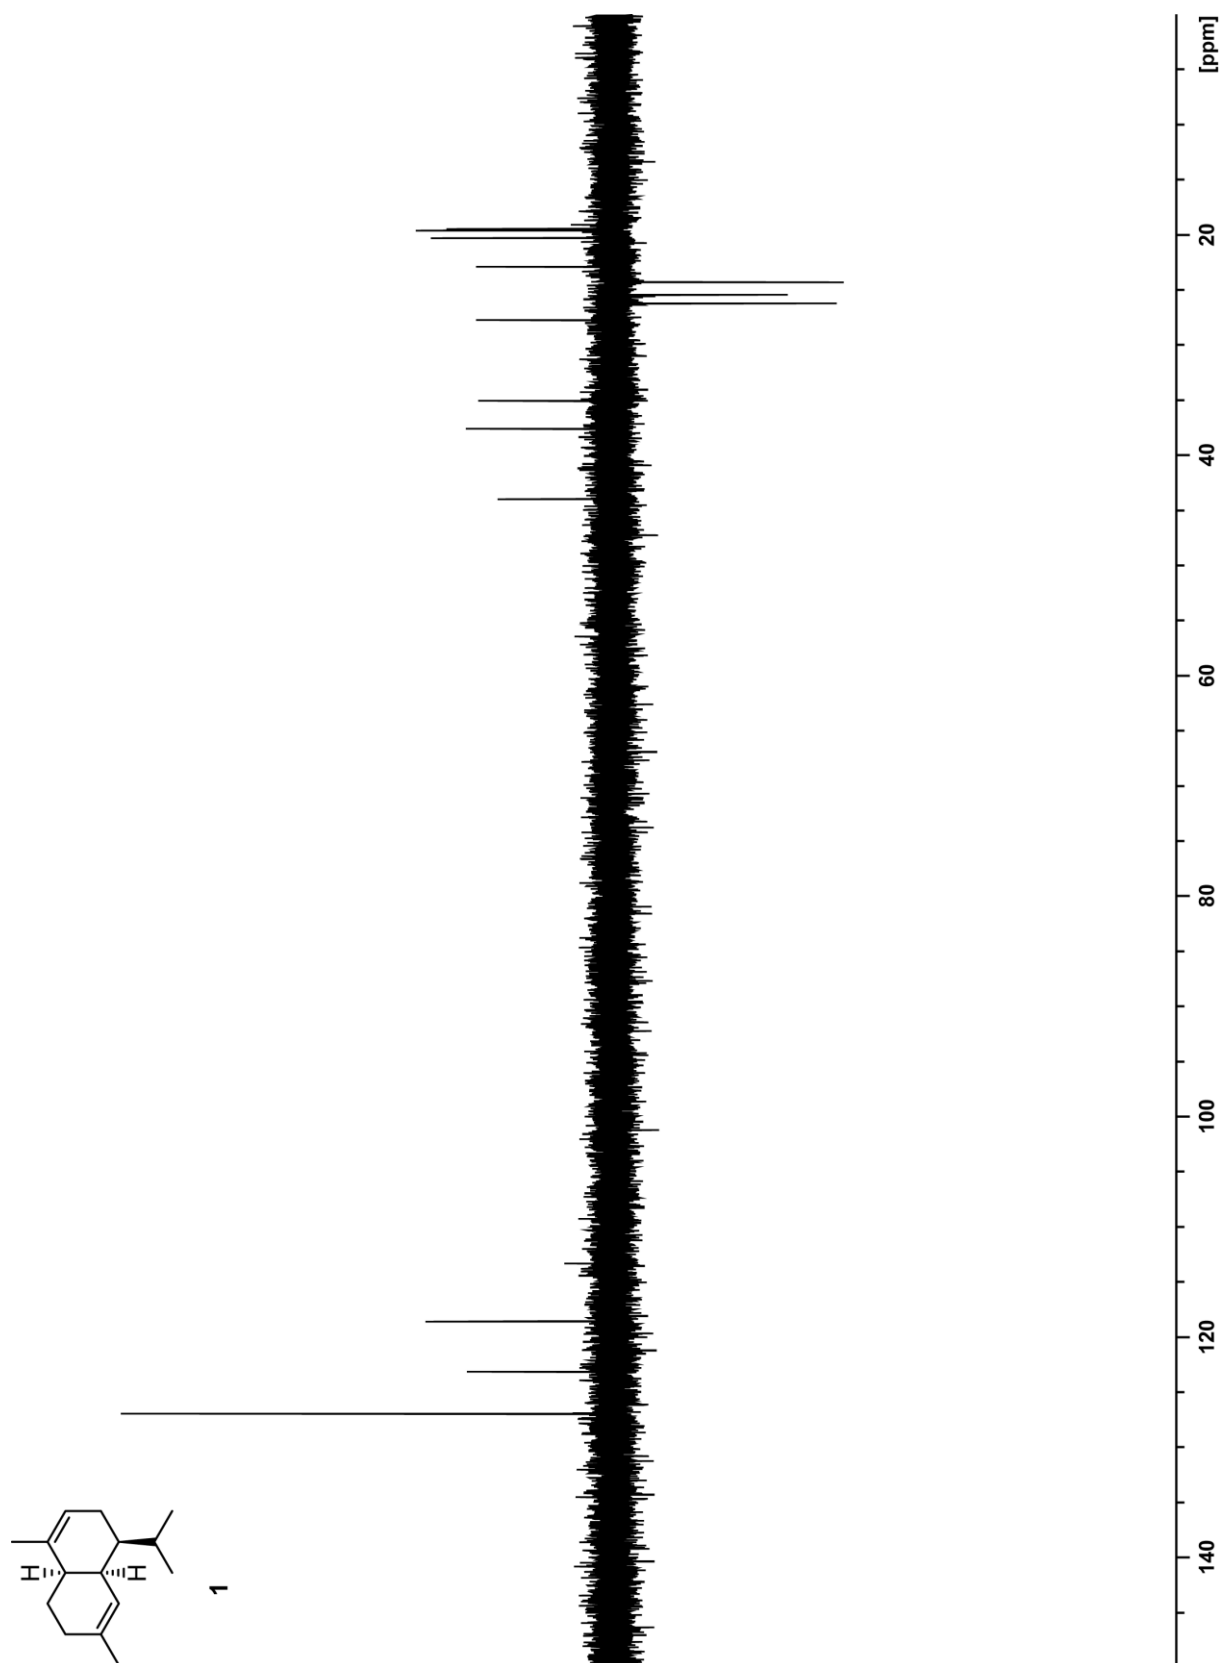

**Figure S4:**  $^{13}\text{C}$ -DEPT135 spectrum of **1** at 125 MHz.

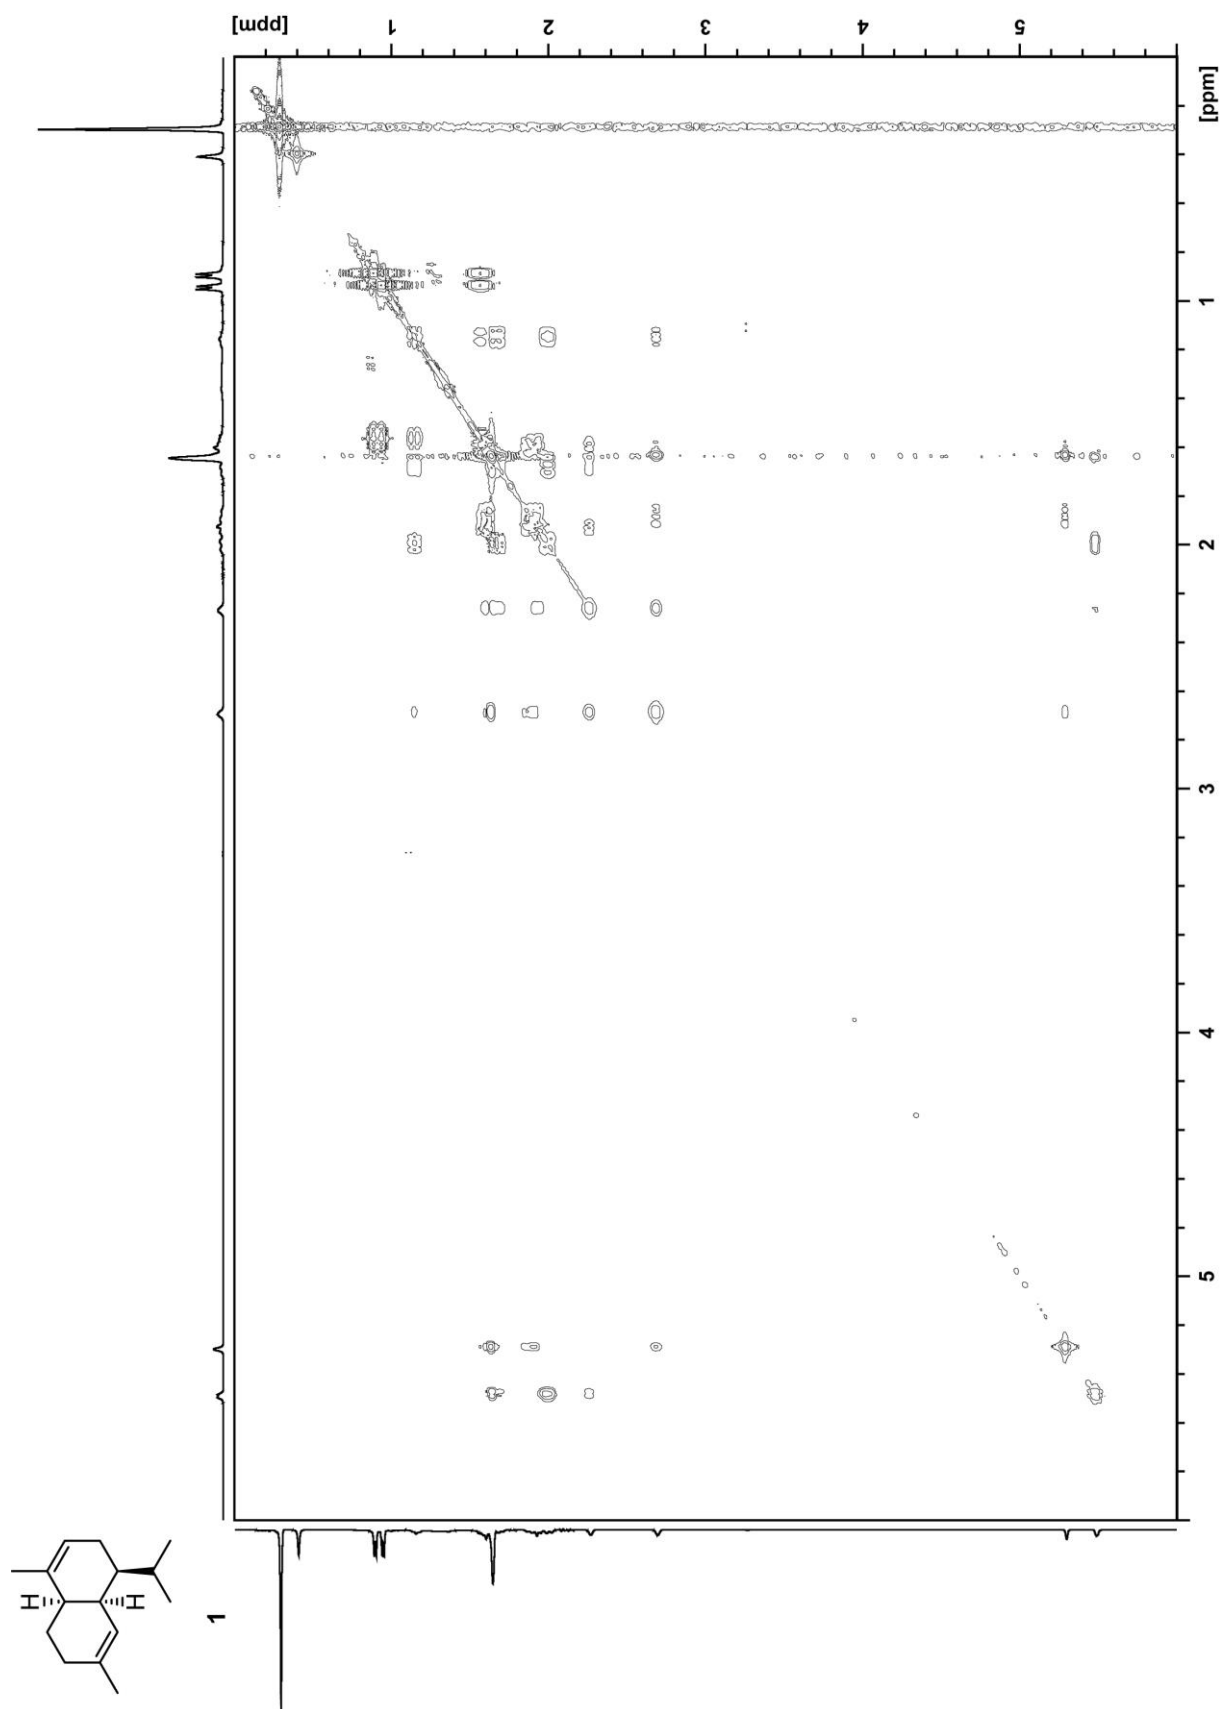

**Figure S5:**  $^1\text{H}, ^1\text{H}$ -COSY spectrum of **1**.



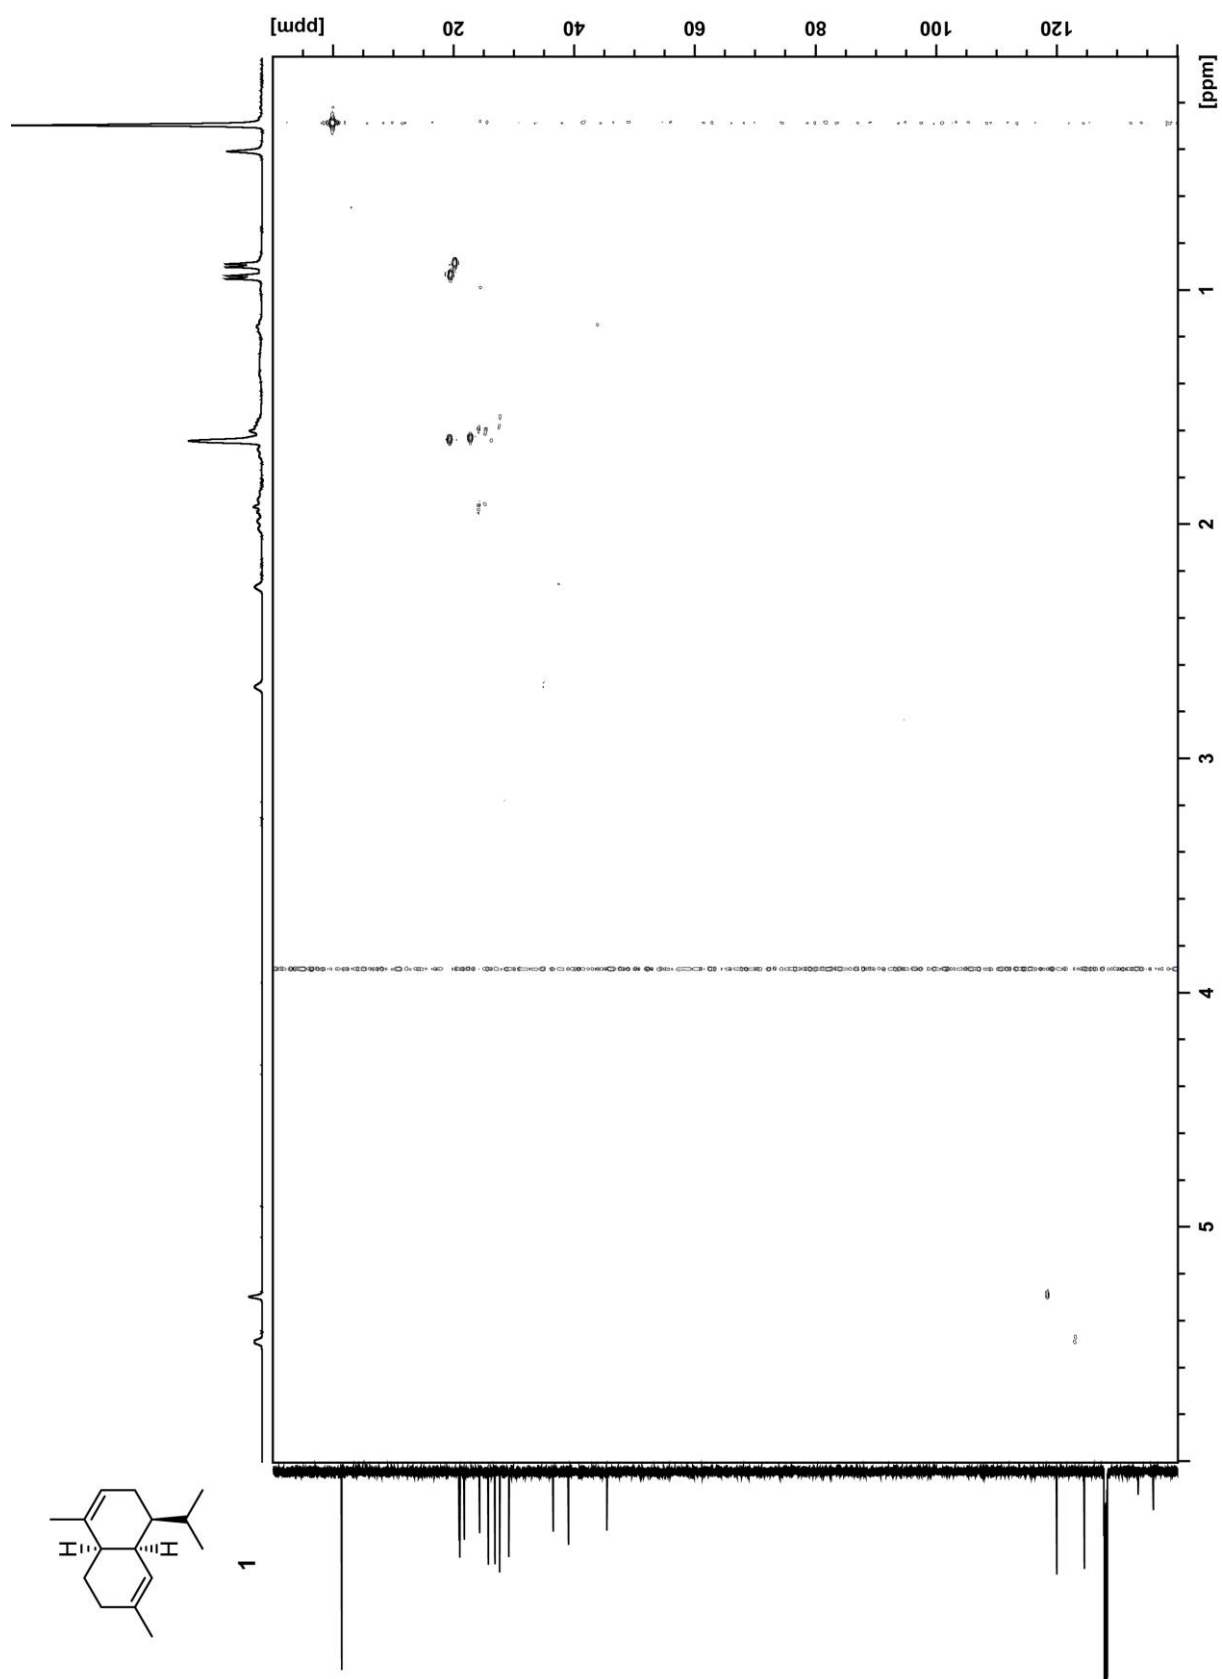

**Figure S6:** HSQC spectrum of 1.

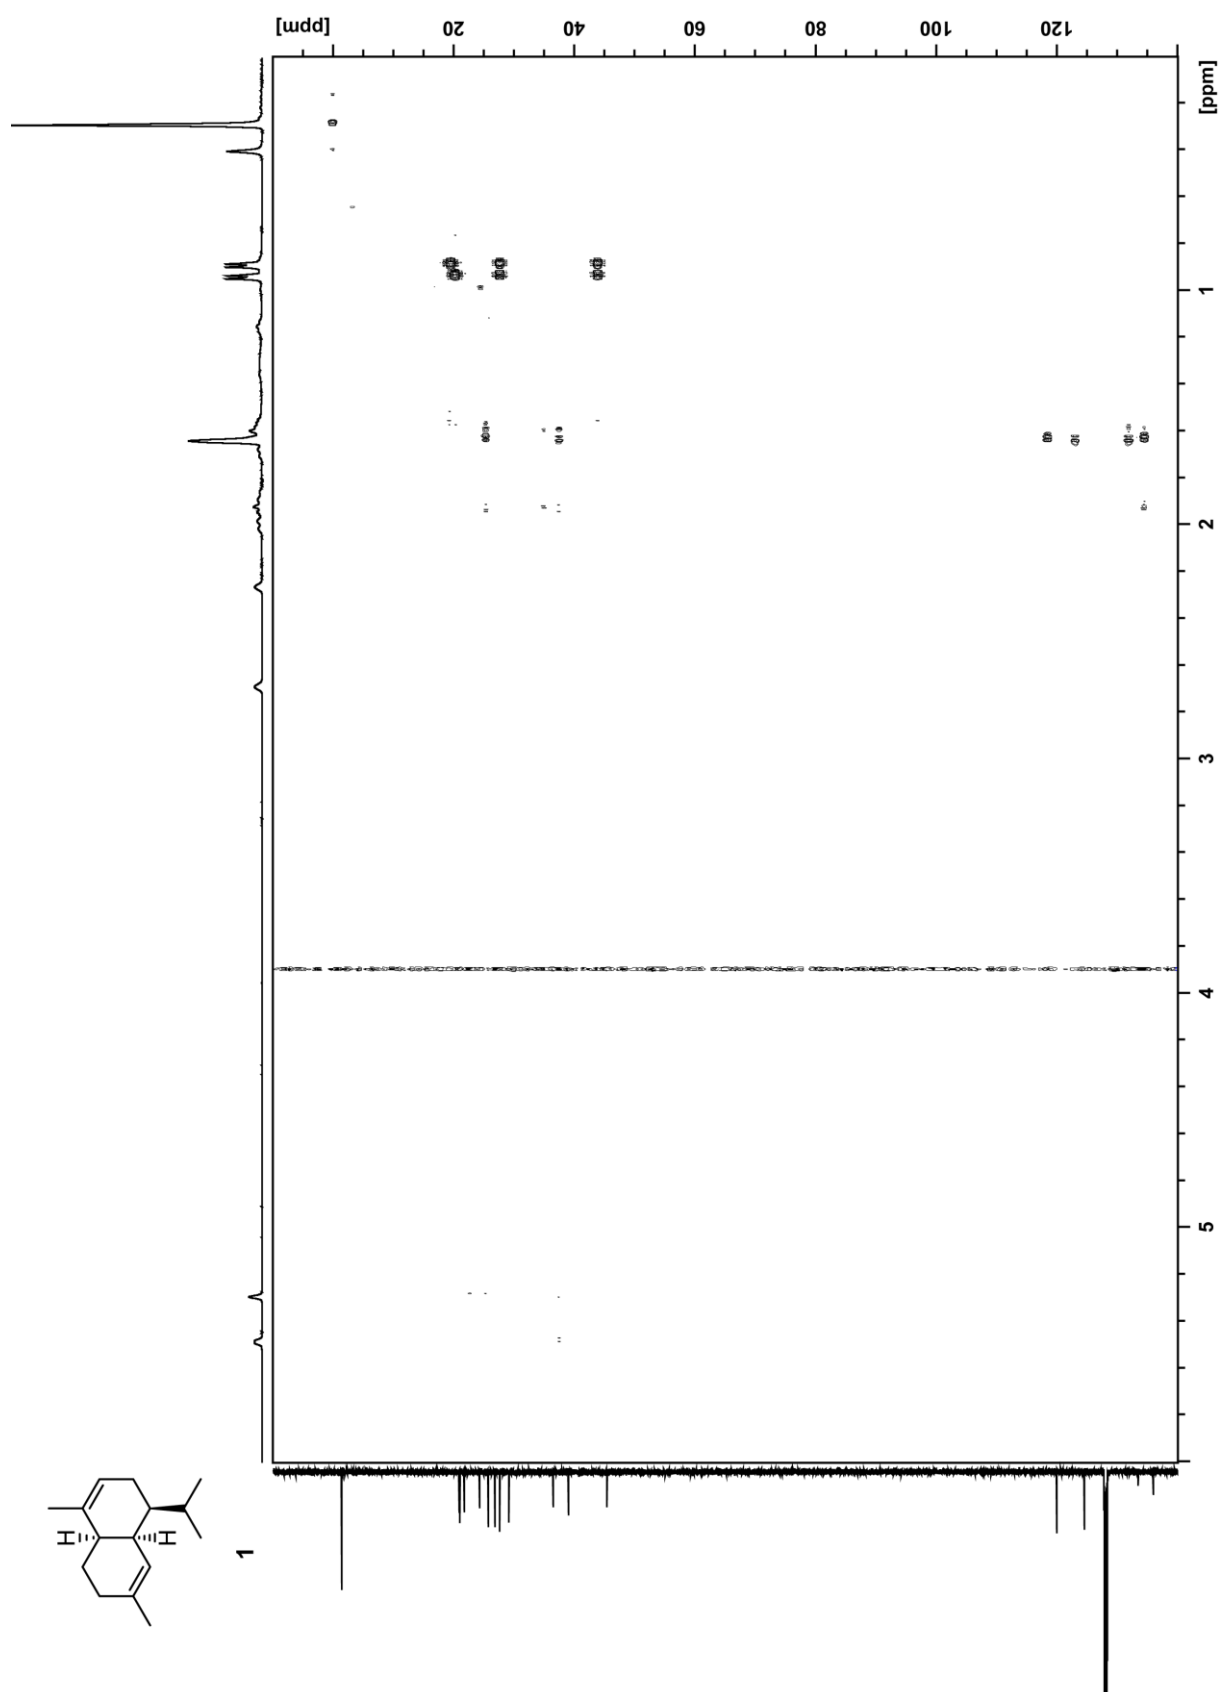

**Figure S7:** HMBC spectrum of **1**.

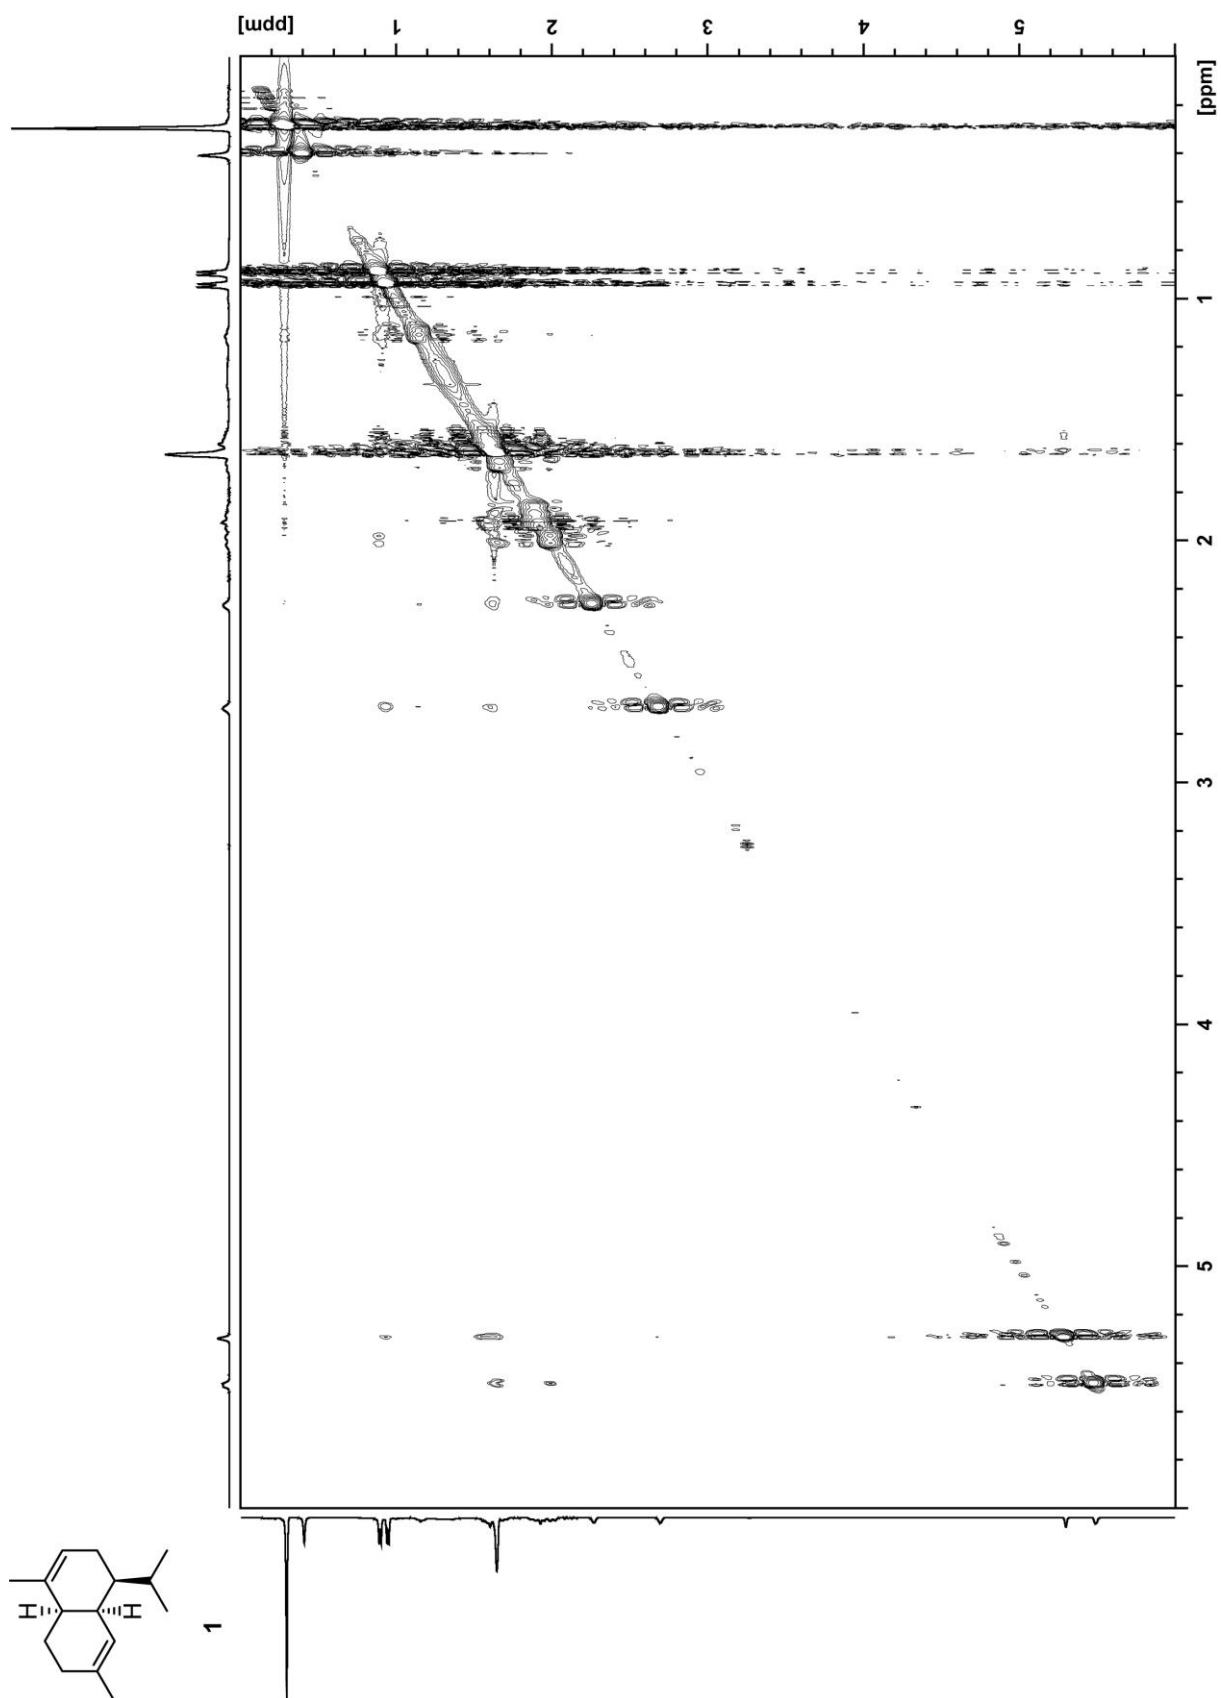

**Figure S8:** NOESY spectrum of **1**.

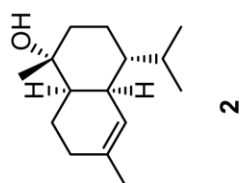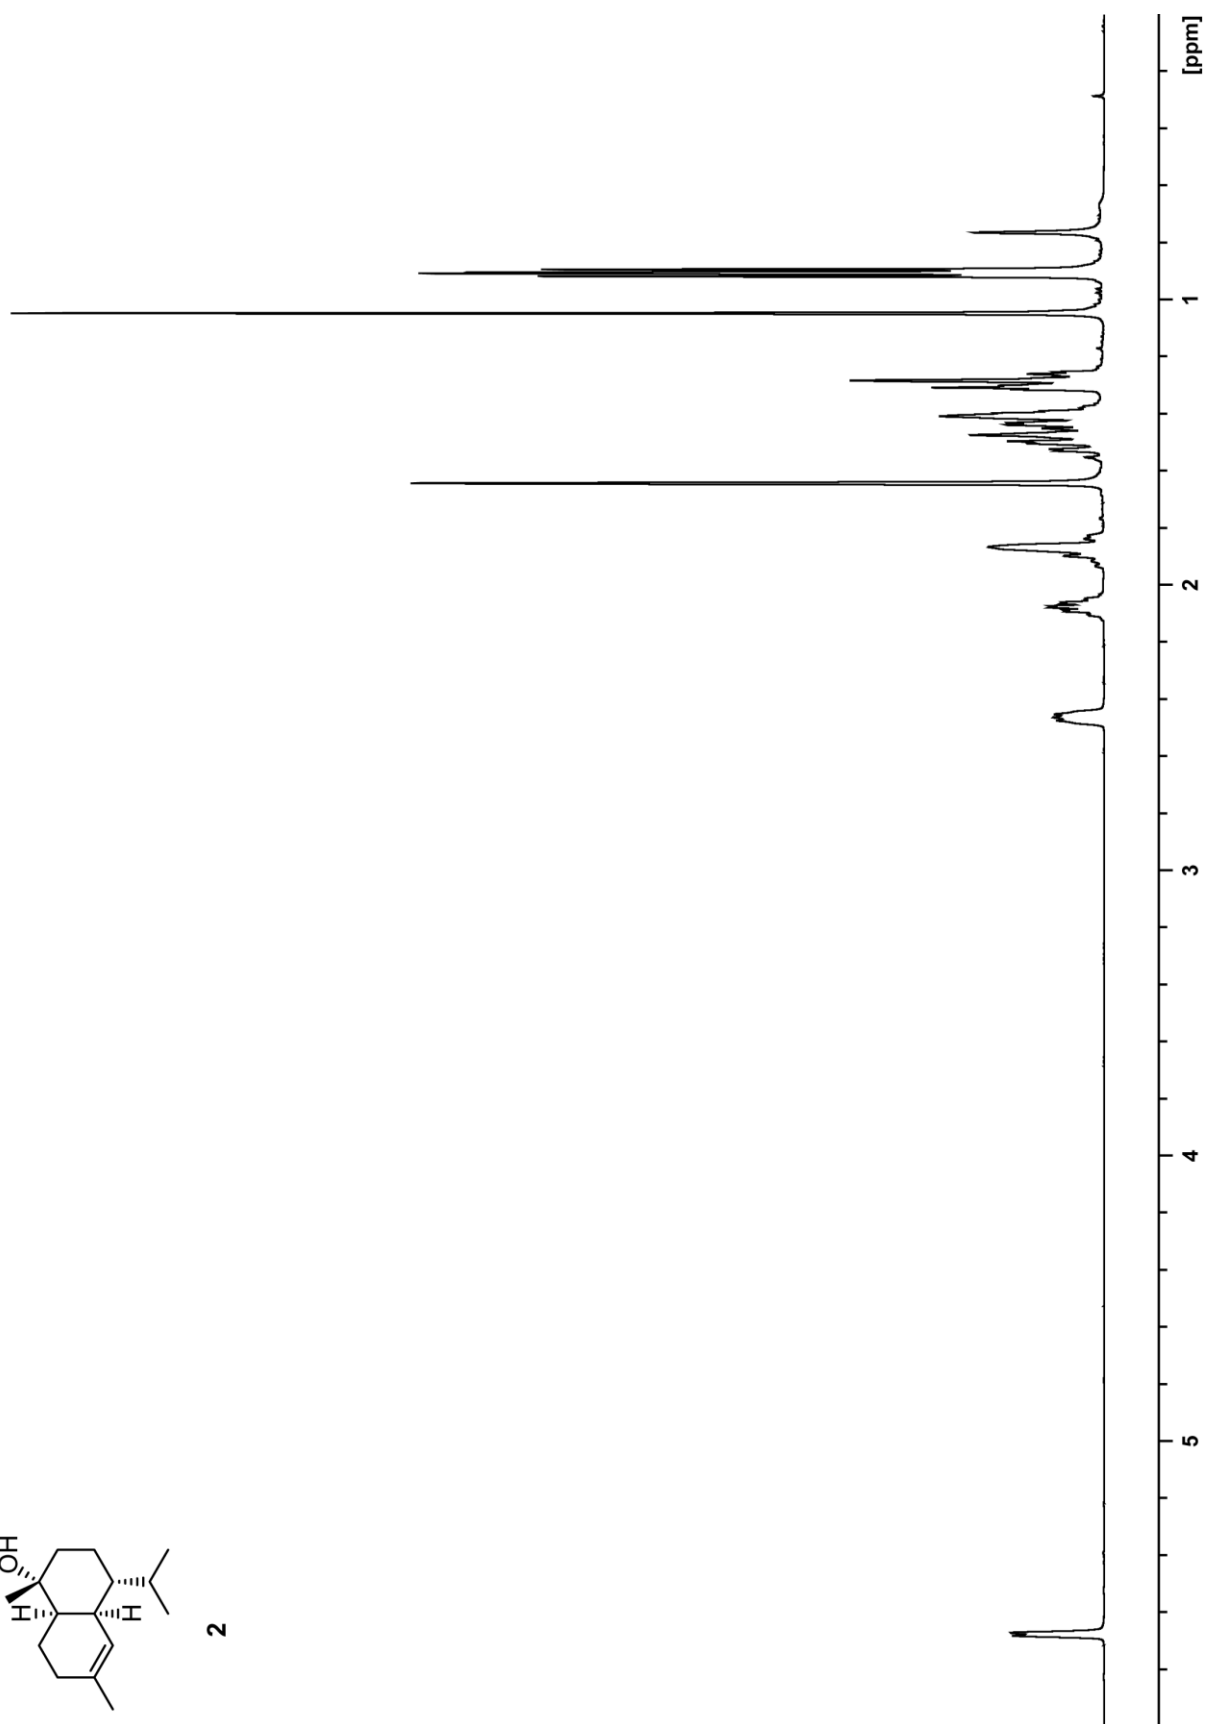

**Figure S9:** <sup>1</sup>H NMR spectrum of **2** at 500 MHz.

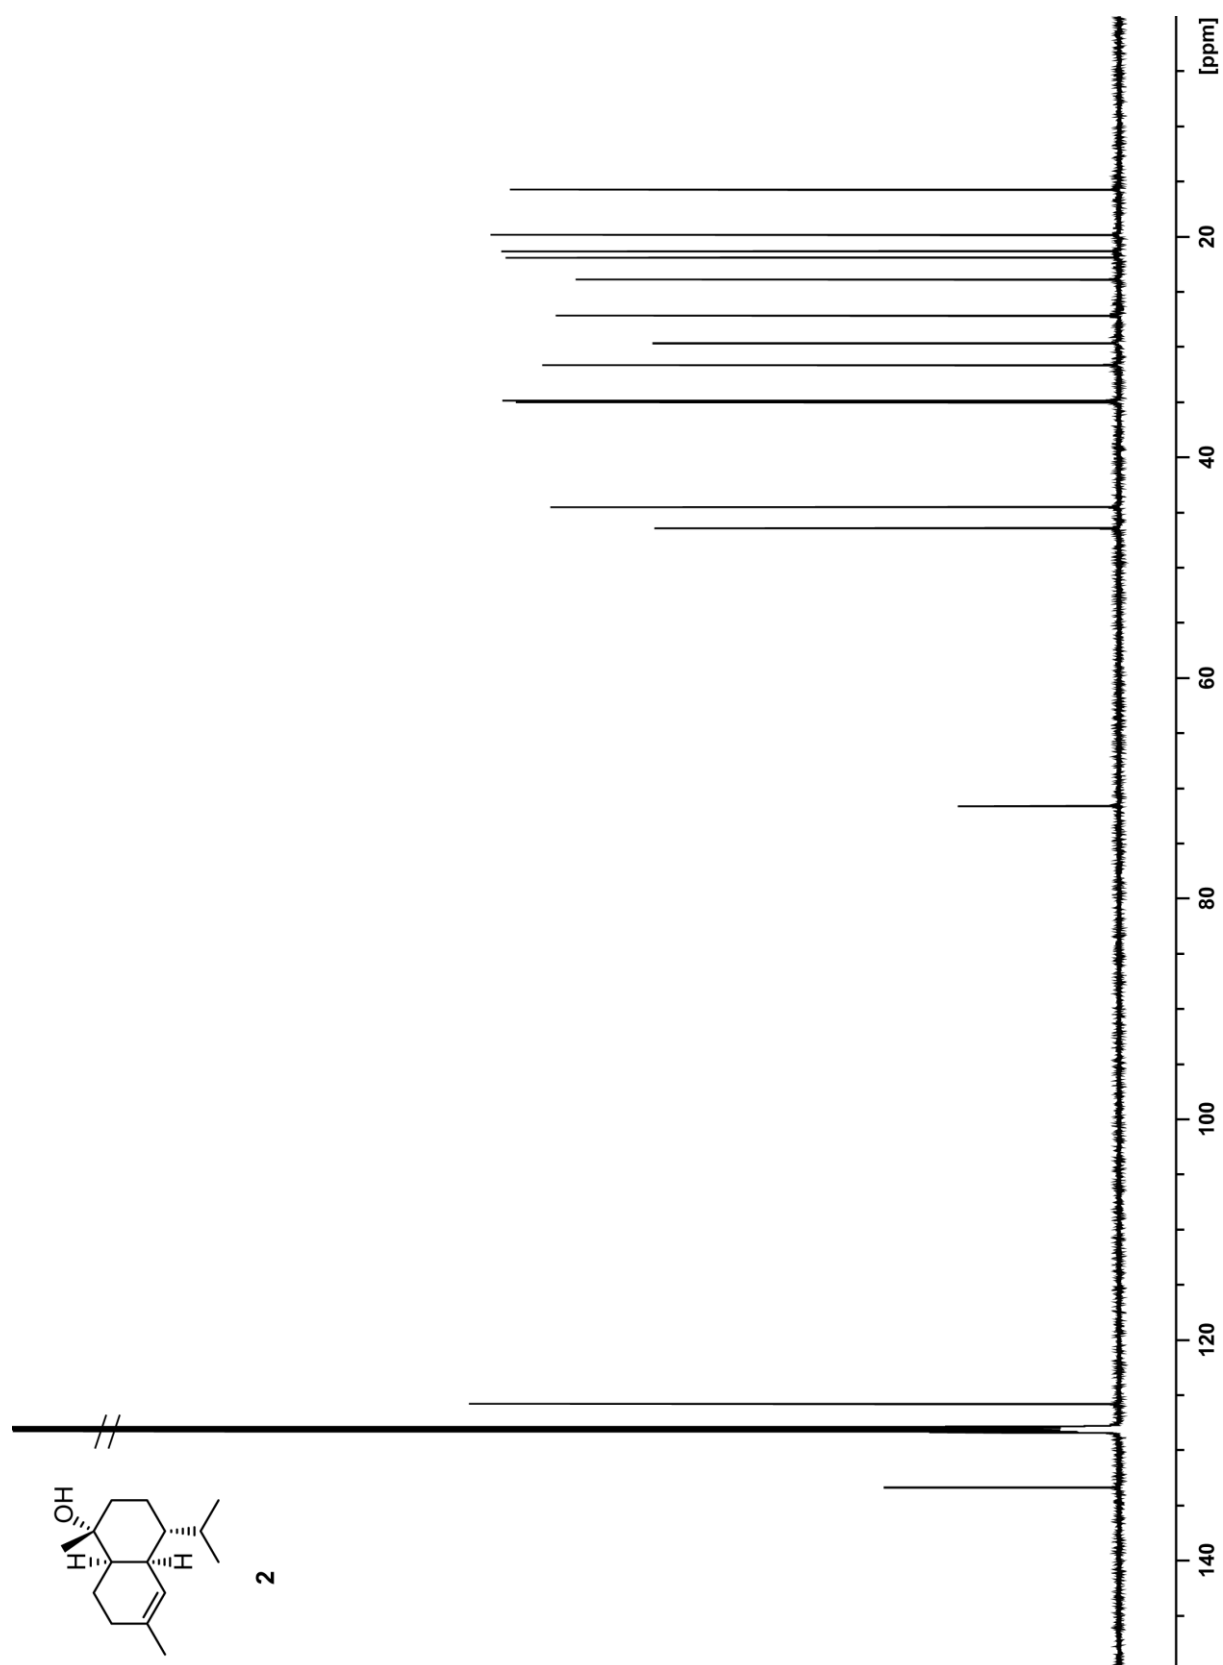

**Figure S10:**  $^{13}\text{C}$  NMR spectrum of **2** at 125 MHz.

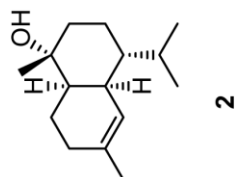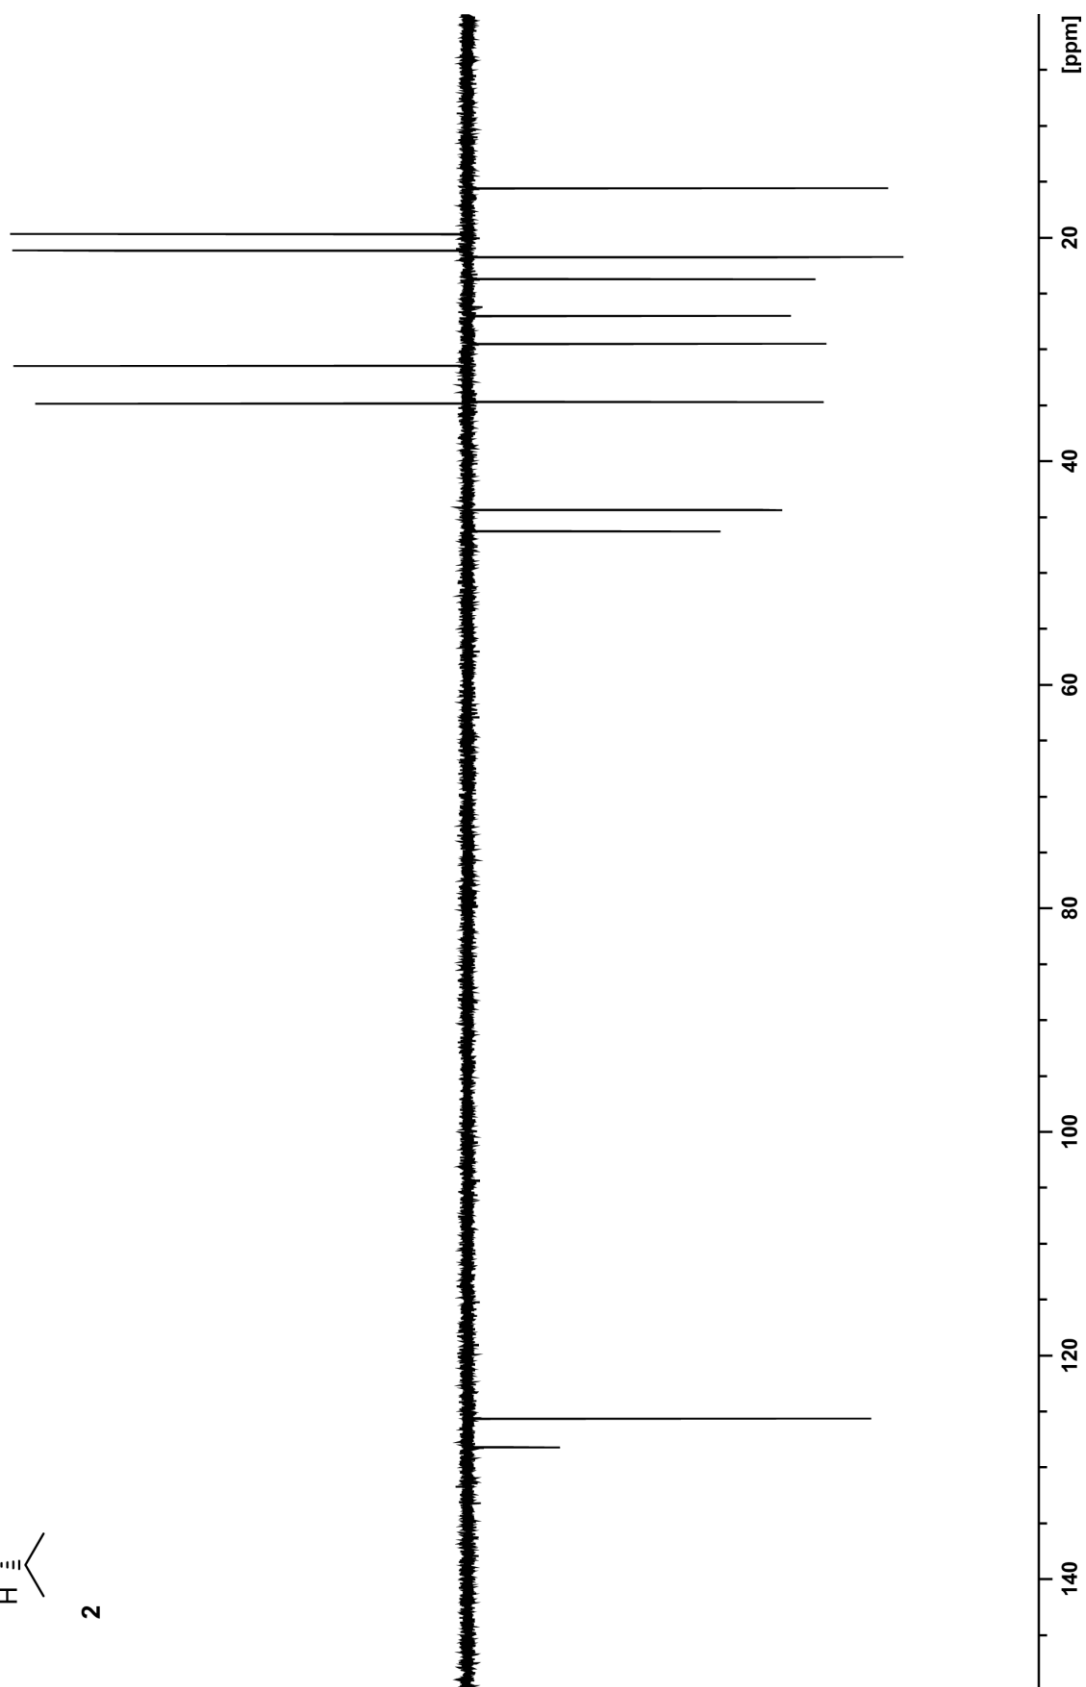

**Figure S11:**  $^{13}\text{C}$ -DEPT135 spectrum of **2** at 125 MHz.

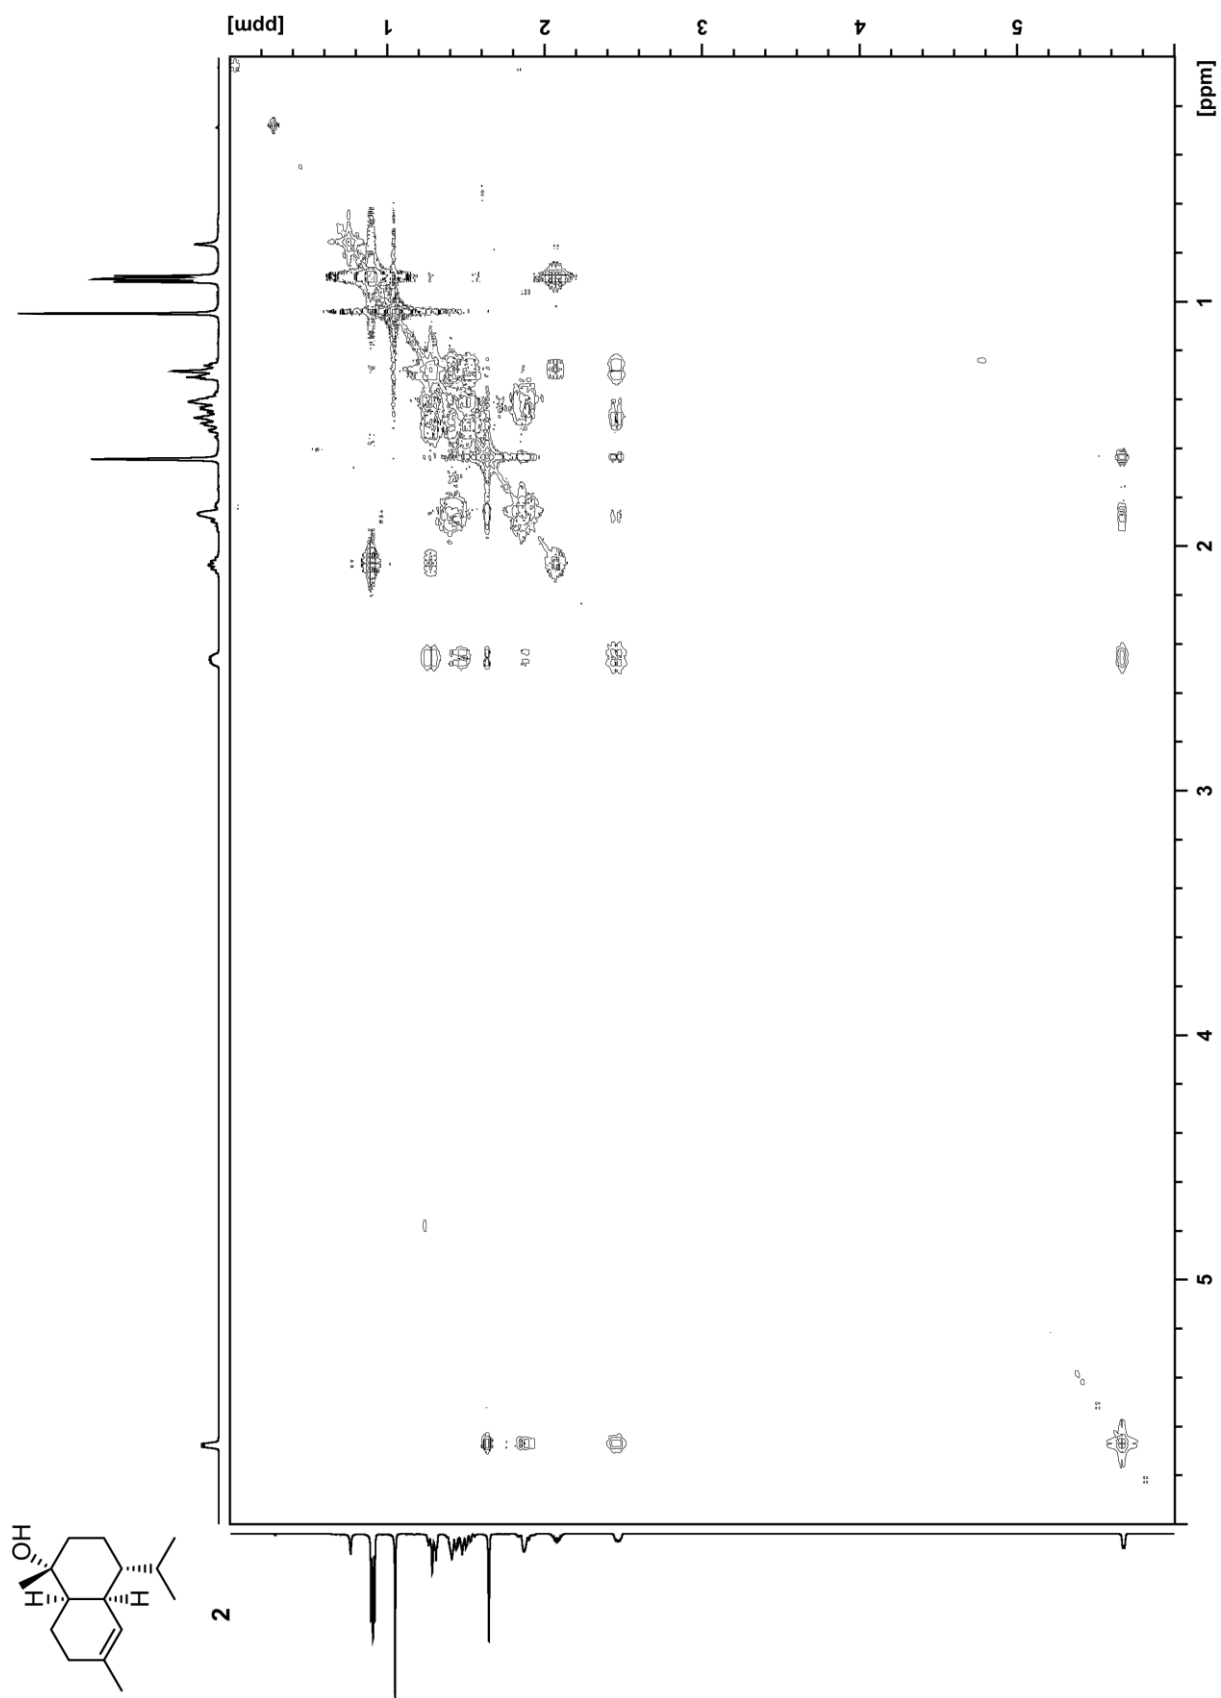

**Figure S12:**  $^1\text{H},^1\text{H}$ -COSY spectrum of **2**.





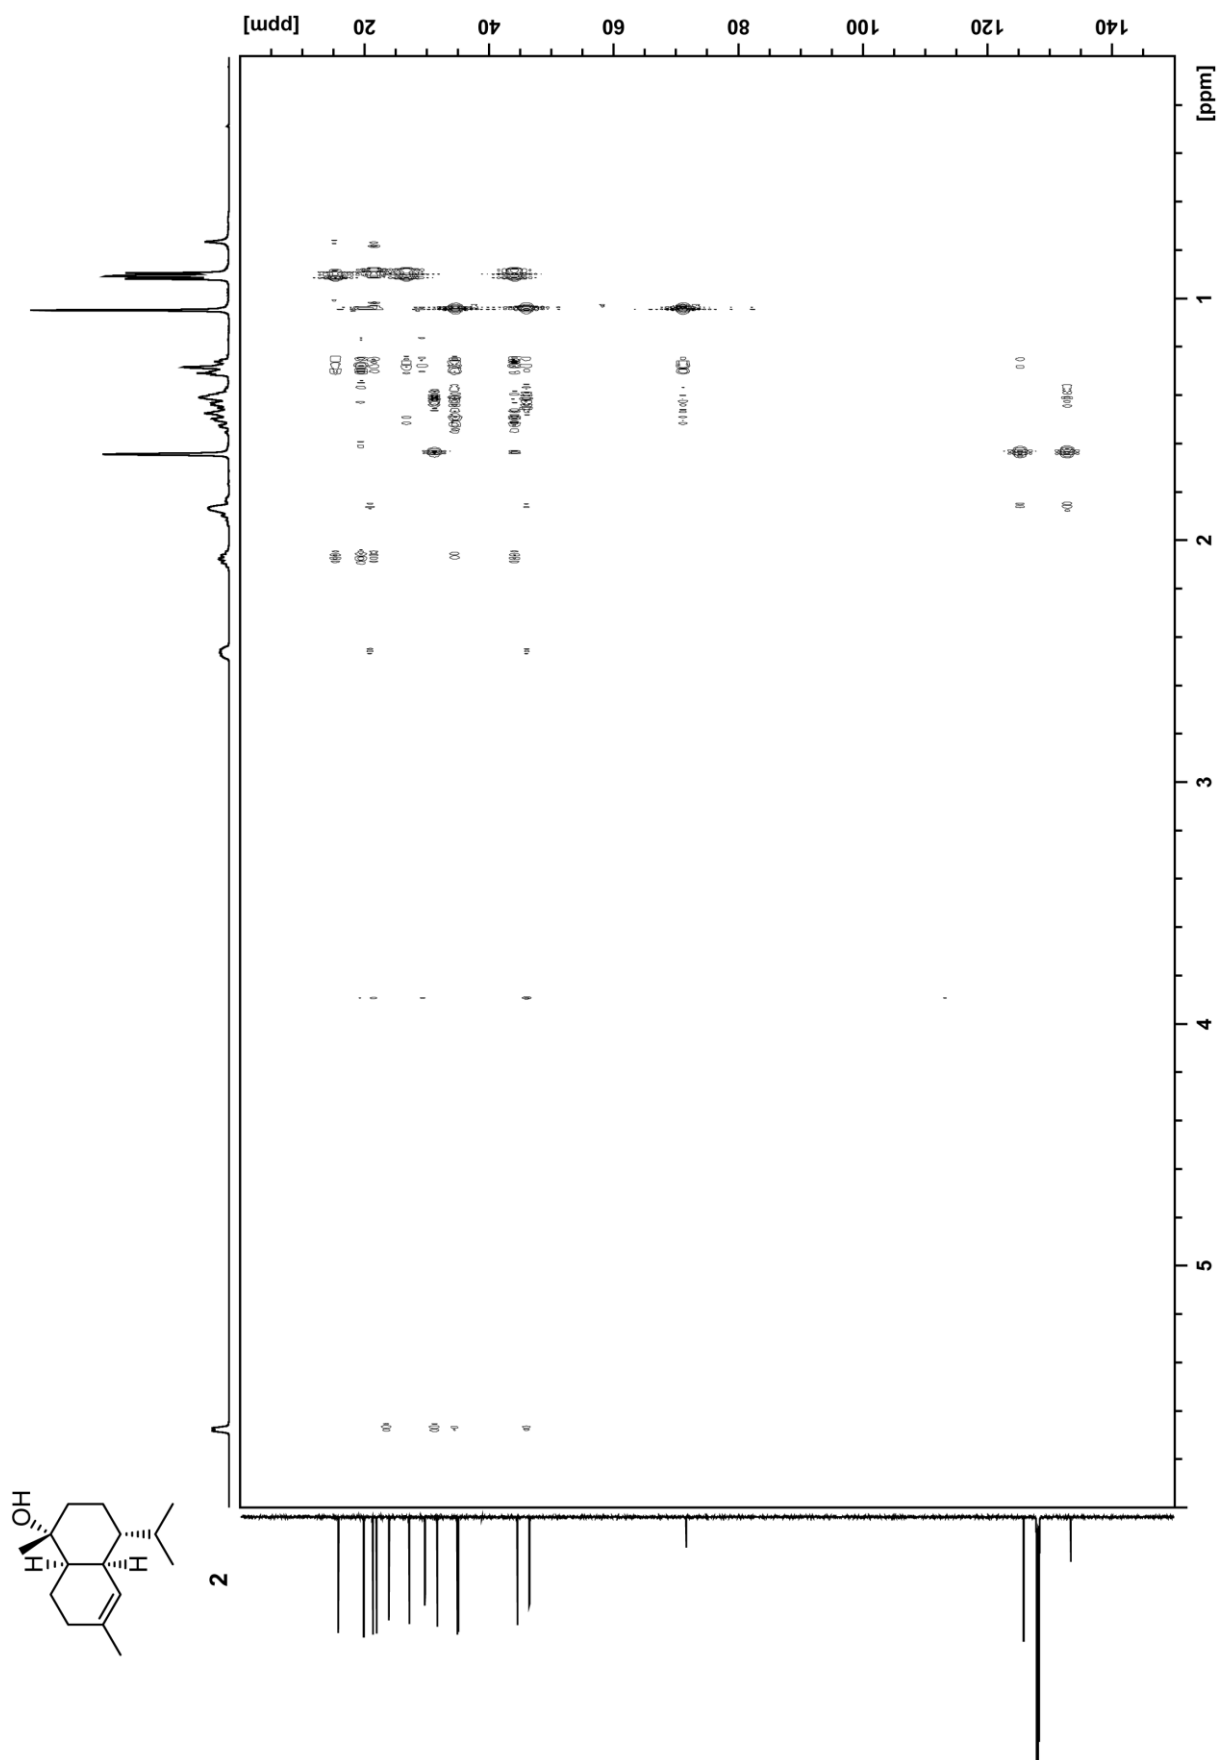

**Figure S14:** HMBC spectrum of **2**.

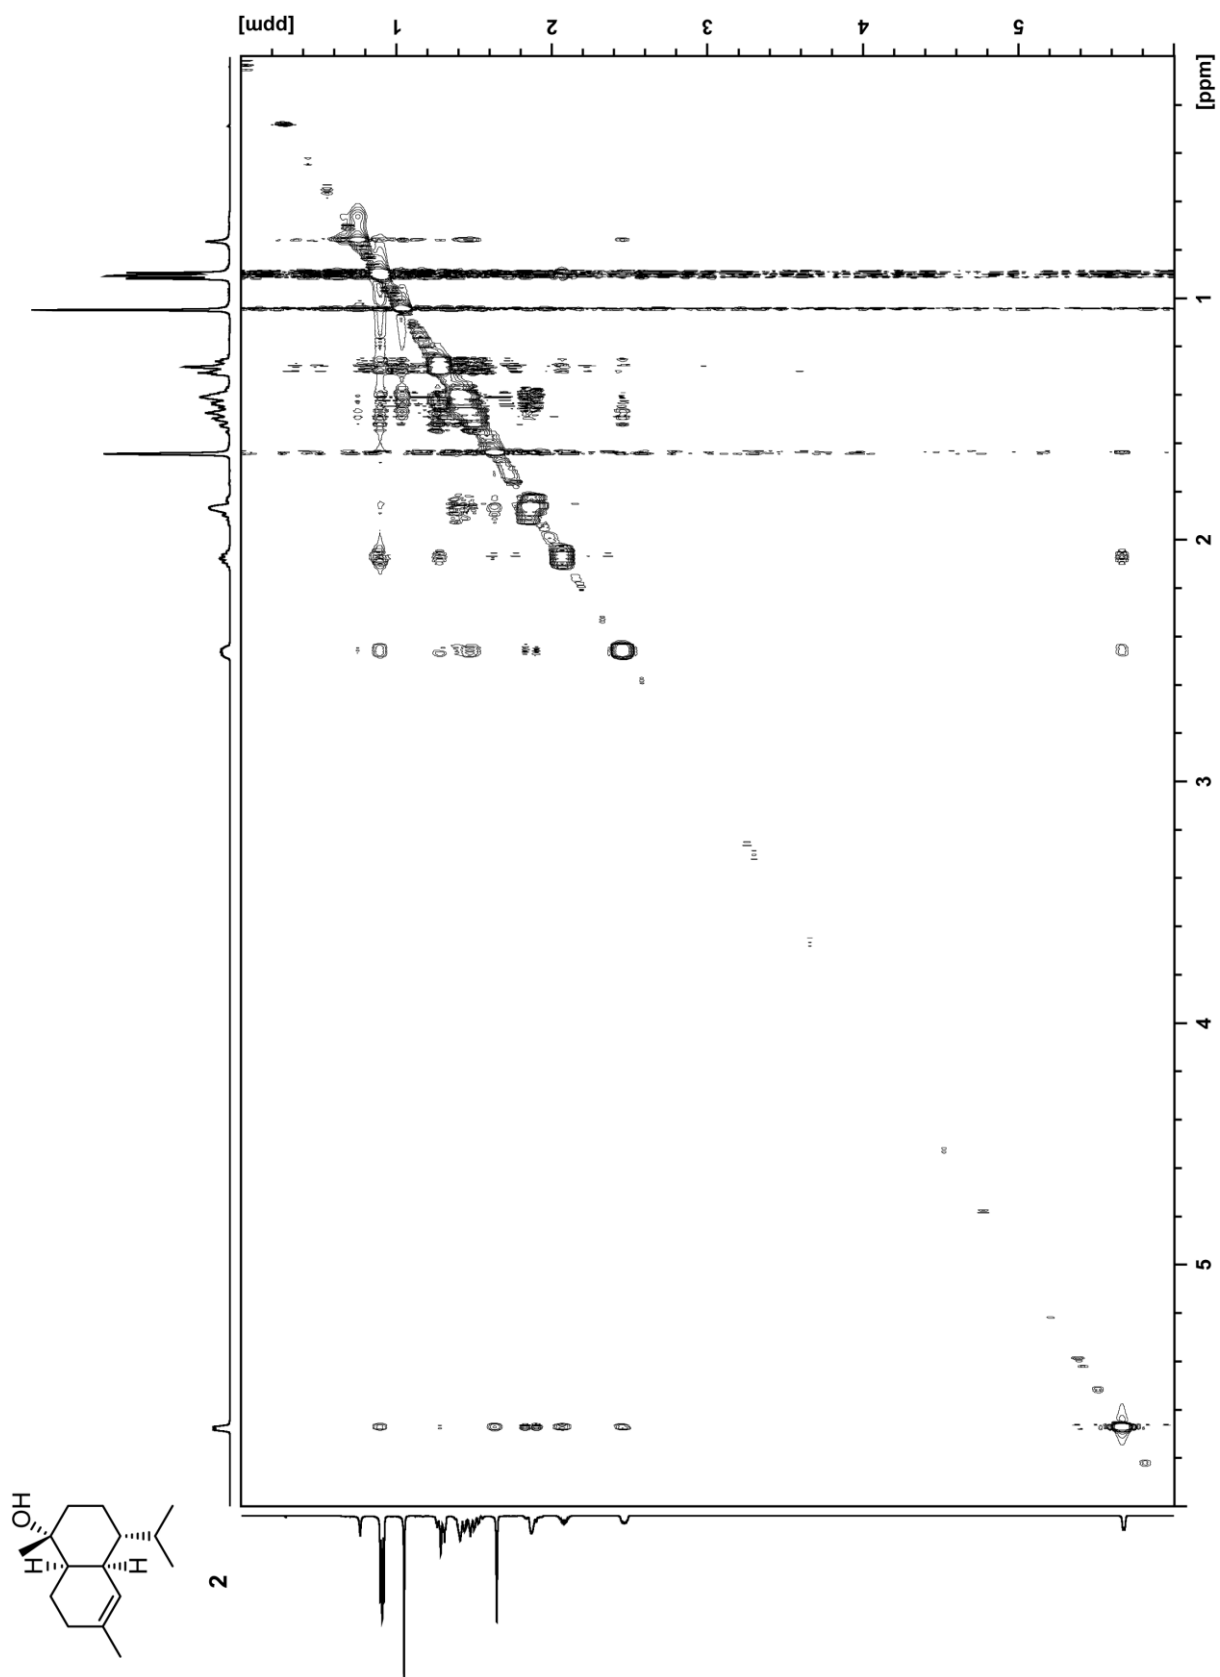

**Figure S15:** NOESY spectrum of **2**.

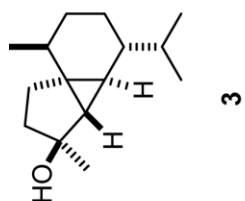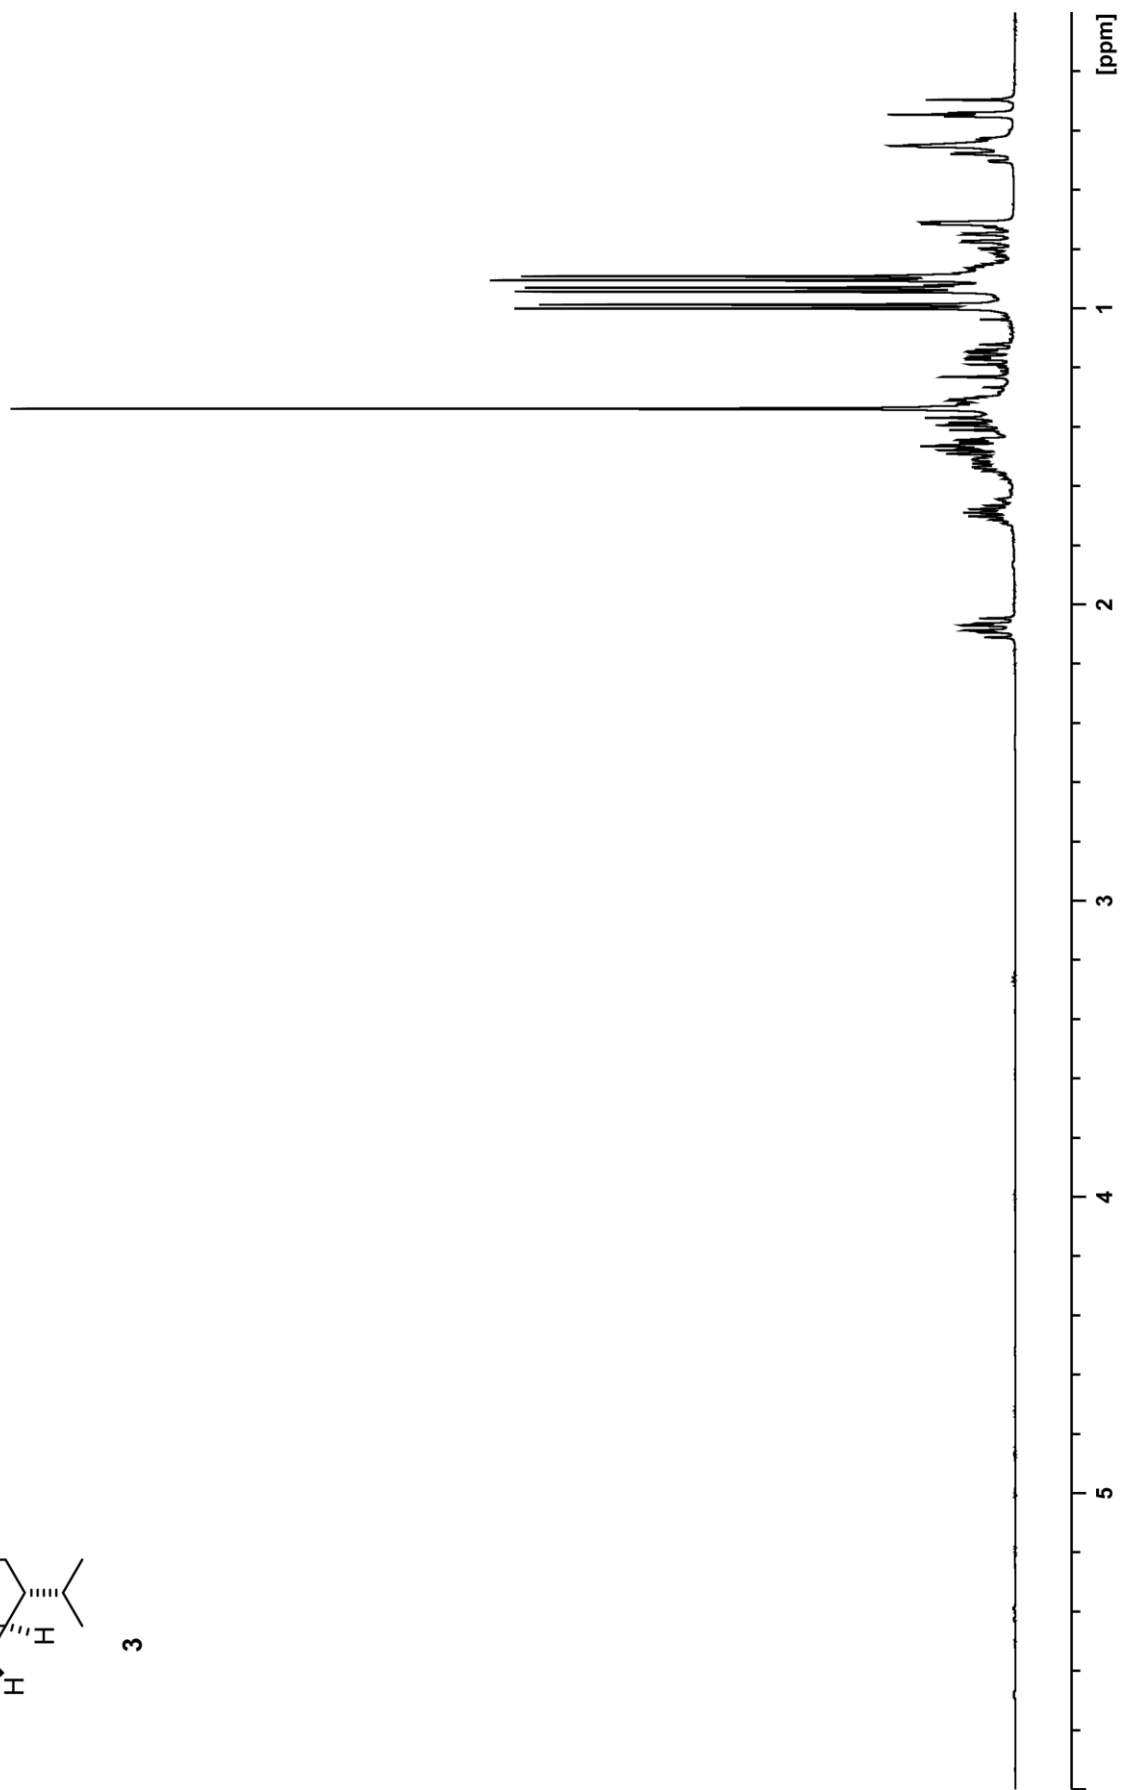

**Figure S16:**  $^1\text{H}$  NMR spectrum of **3** at 500 MHz.

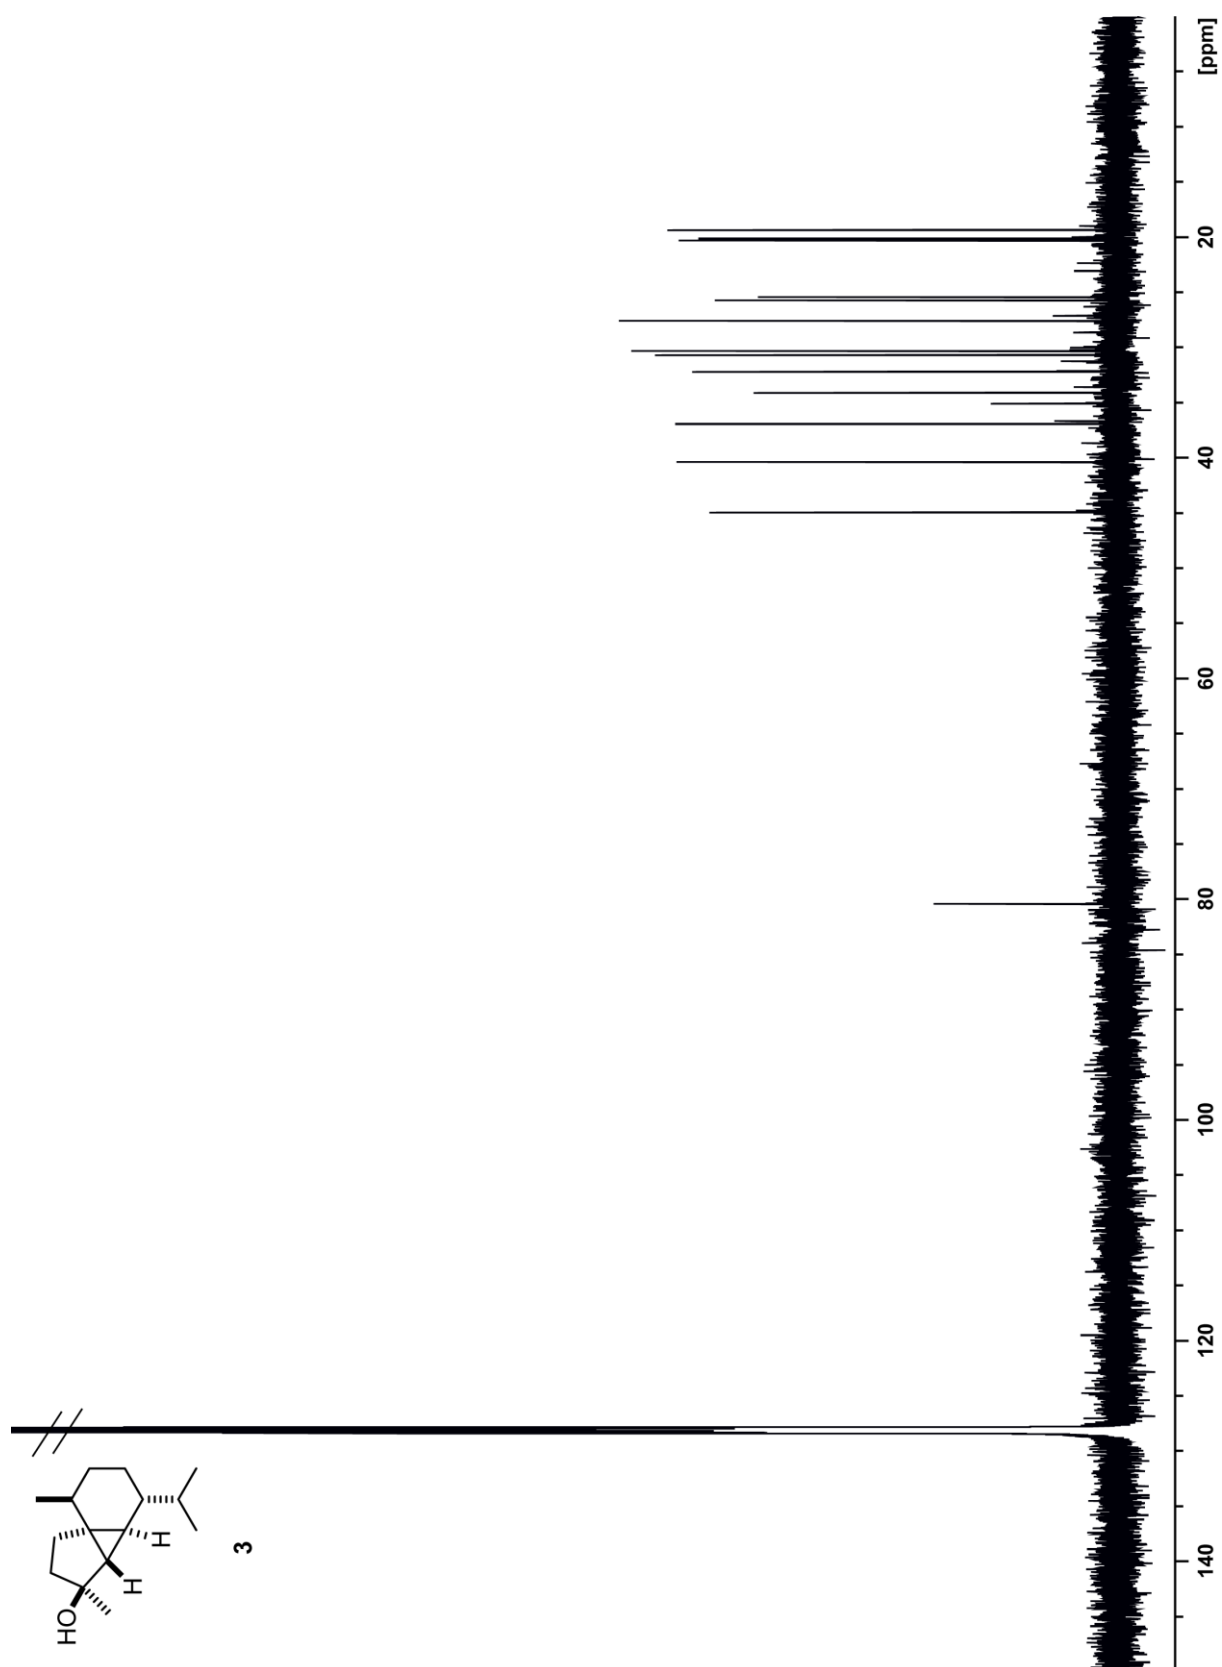

**Figure S17:**  $^{13}\text{C}$  NMR spectrum of **3** at 125 MHz.

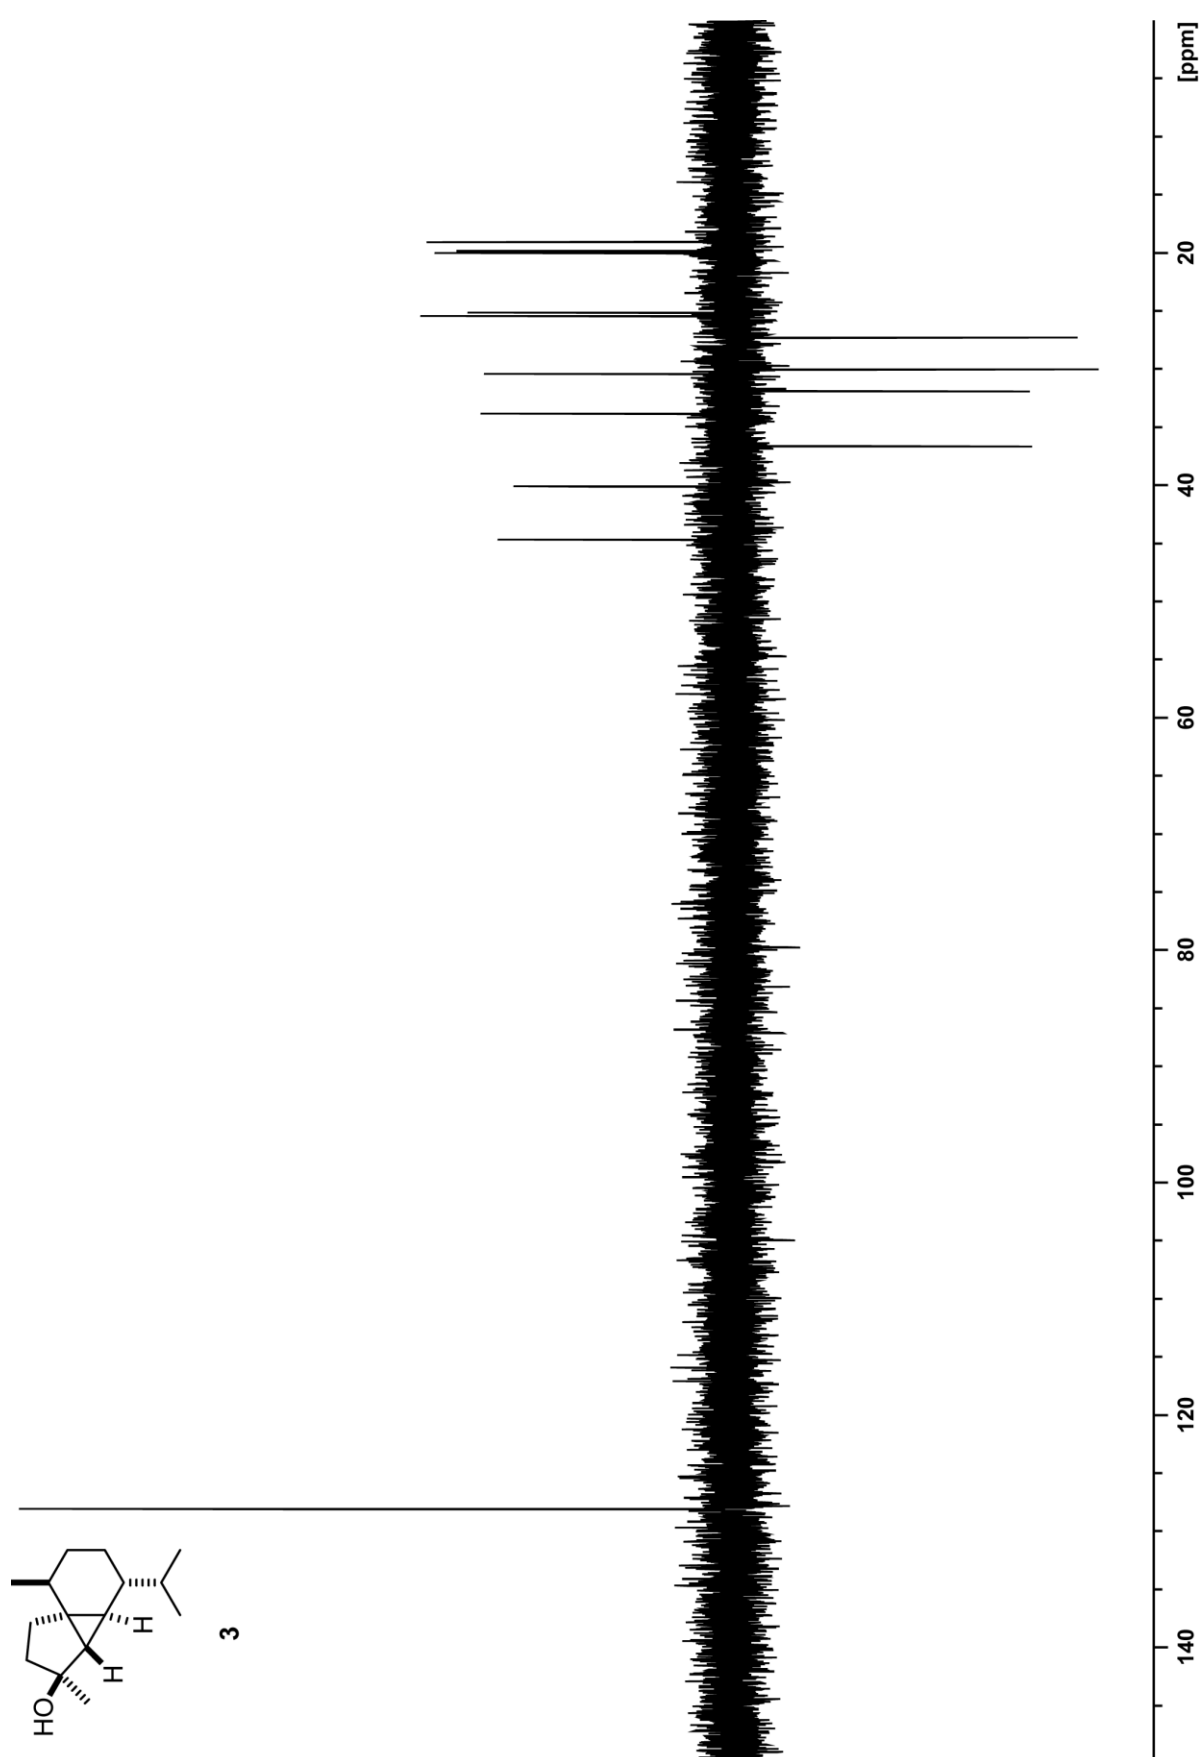

**Figure S18:**  $^{13}\text{C}$ -DEPT135 NMR spectrum of **3** at 125 MHz.

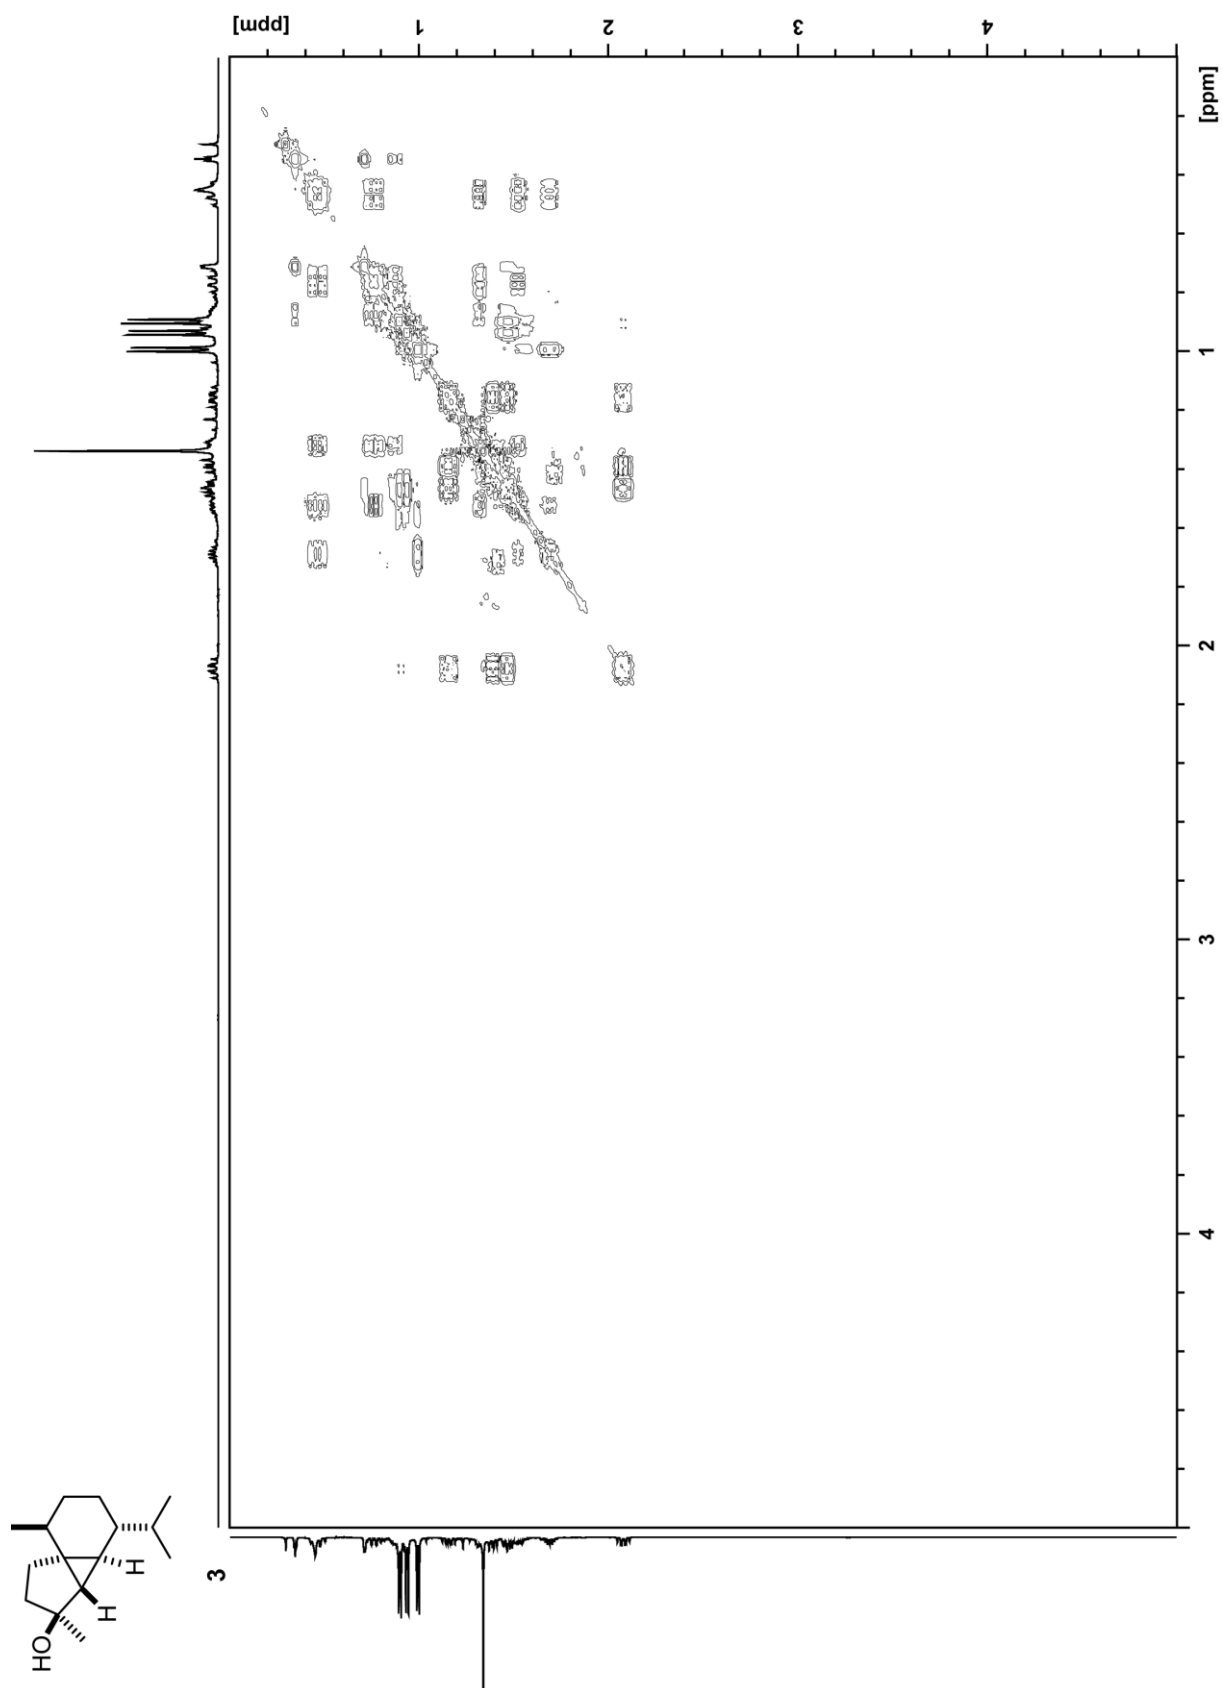

**Figure S19:**  $^1\text{H}$ ,  $^1\text{H}$ -COSY NMR spectrum of **3**.

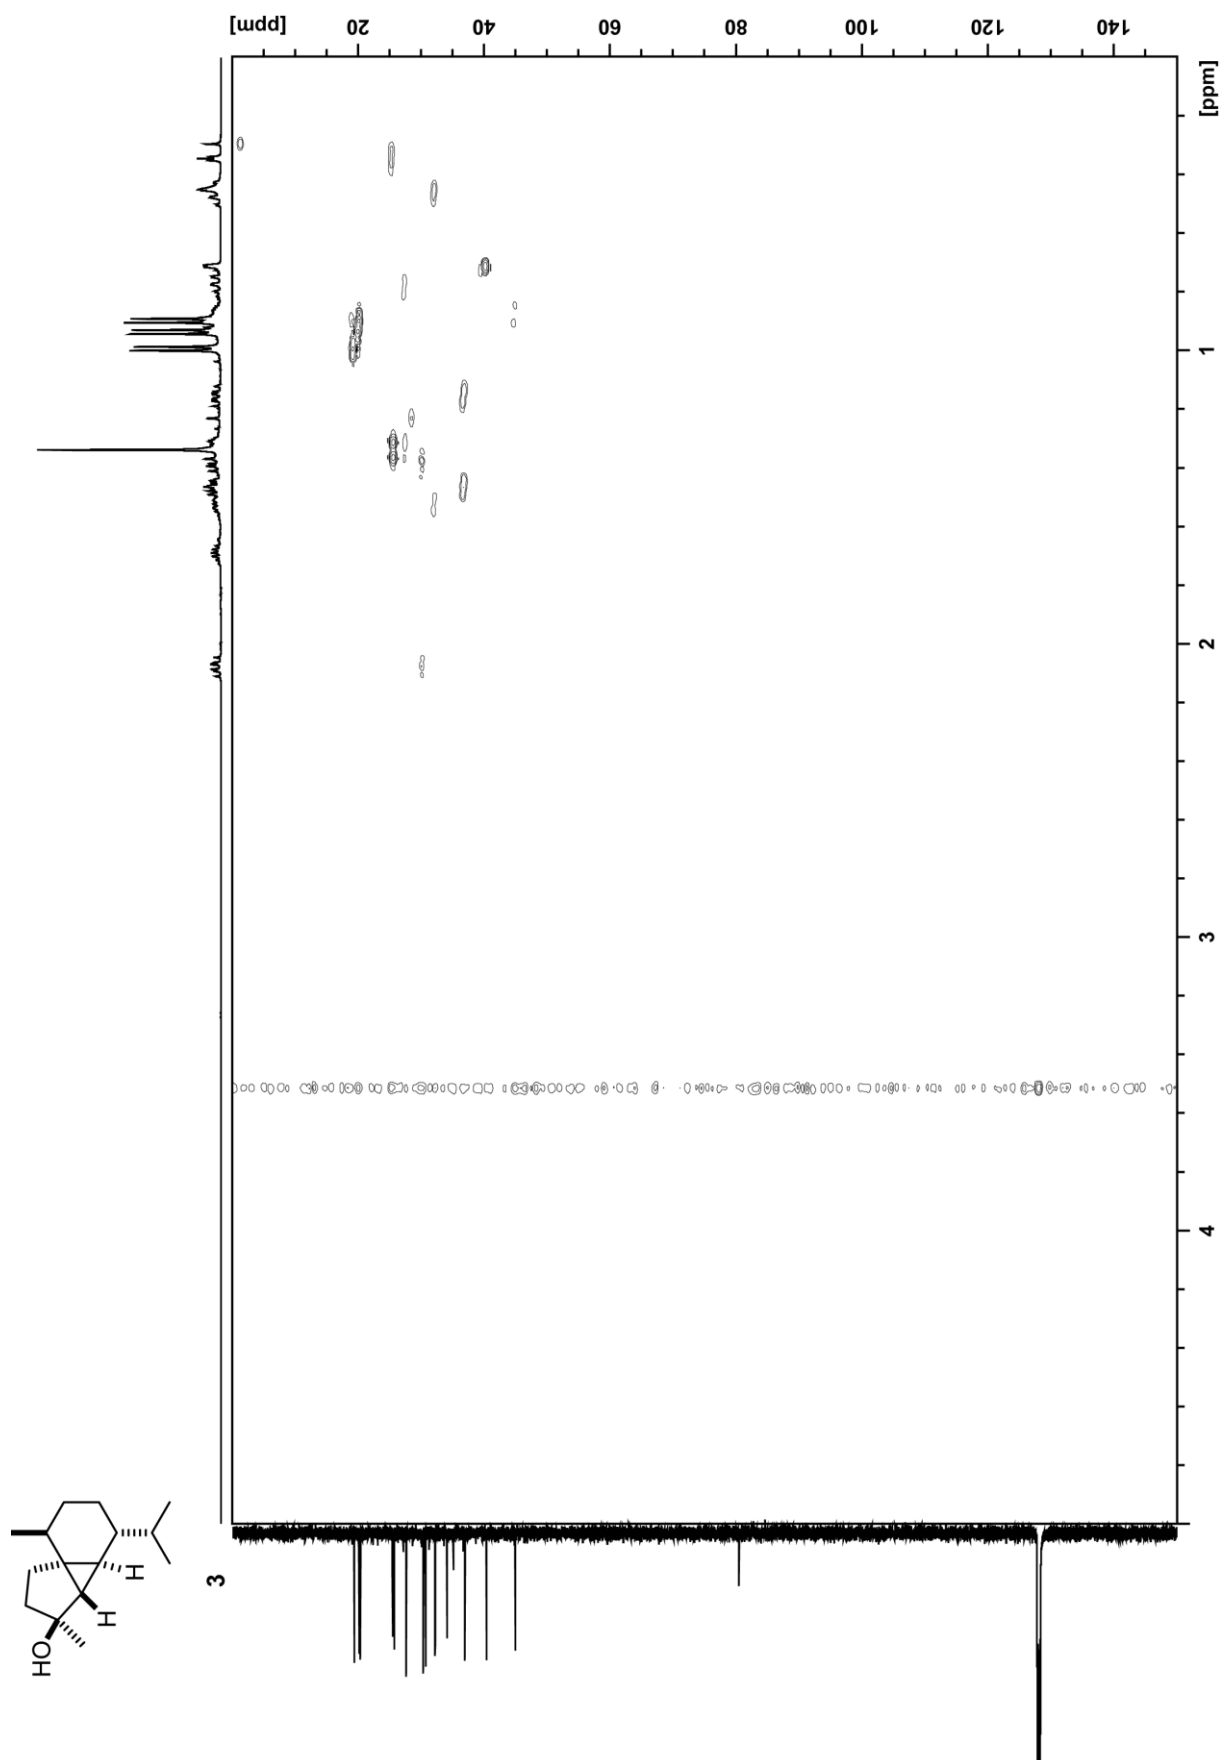

**Figure S20:** HSQC spectrum of **3**.

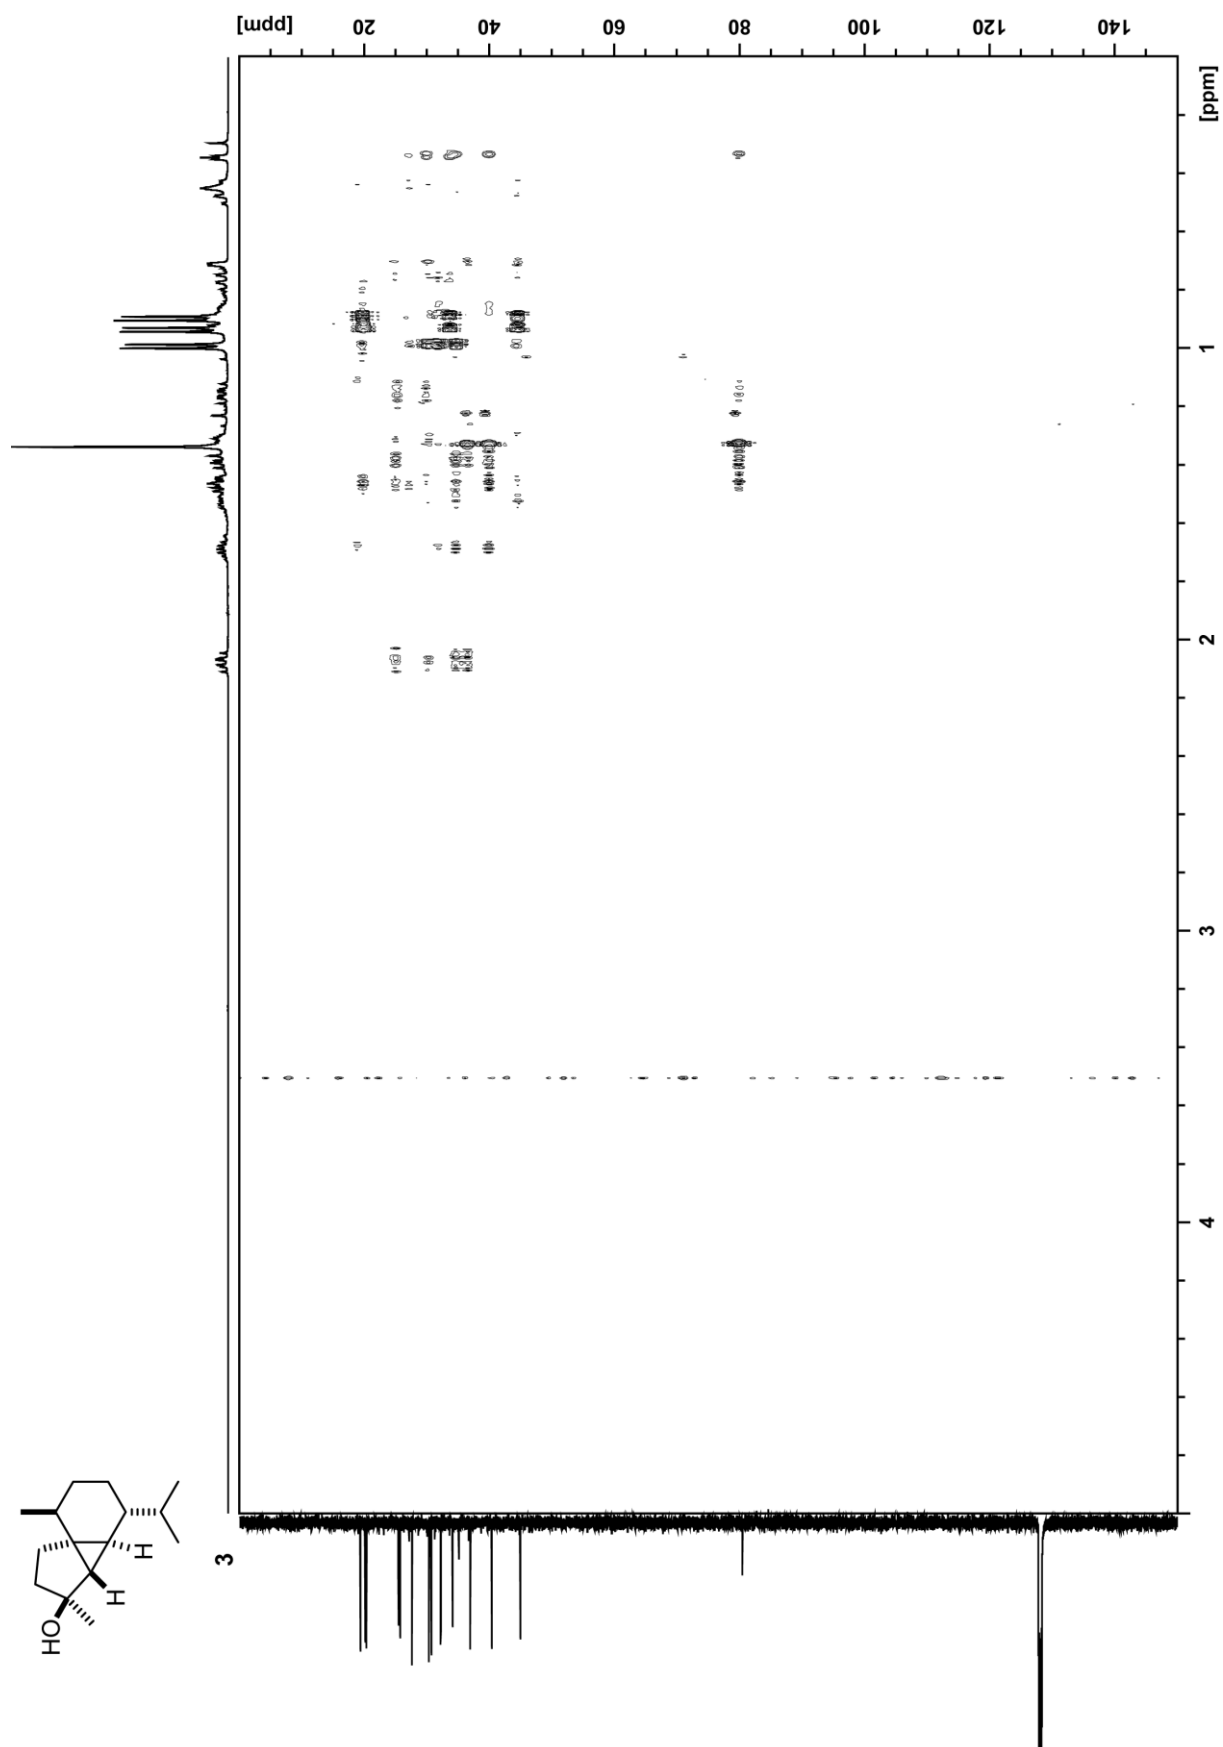

Figure S21: HMBC spectrum of **3**.



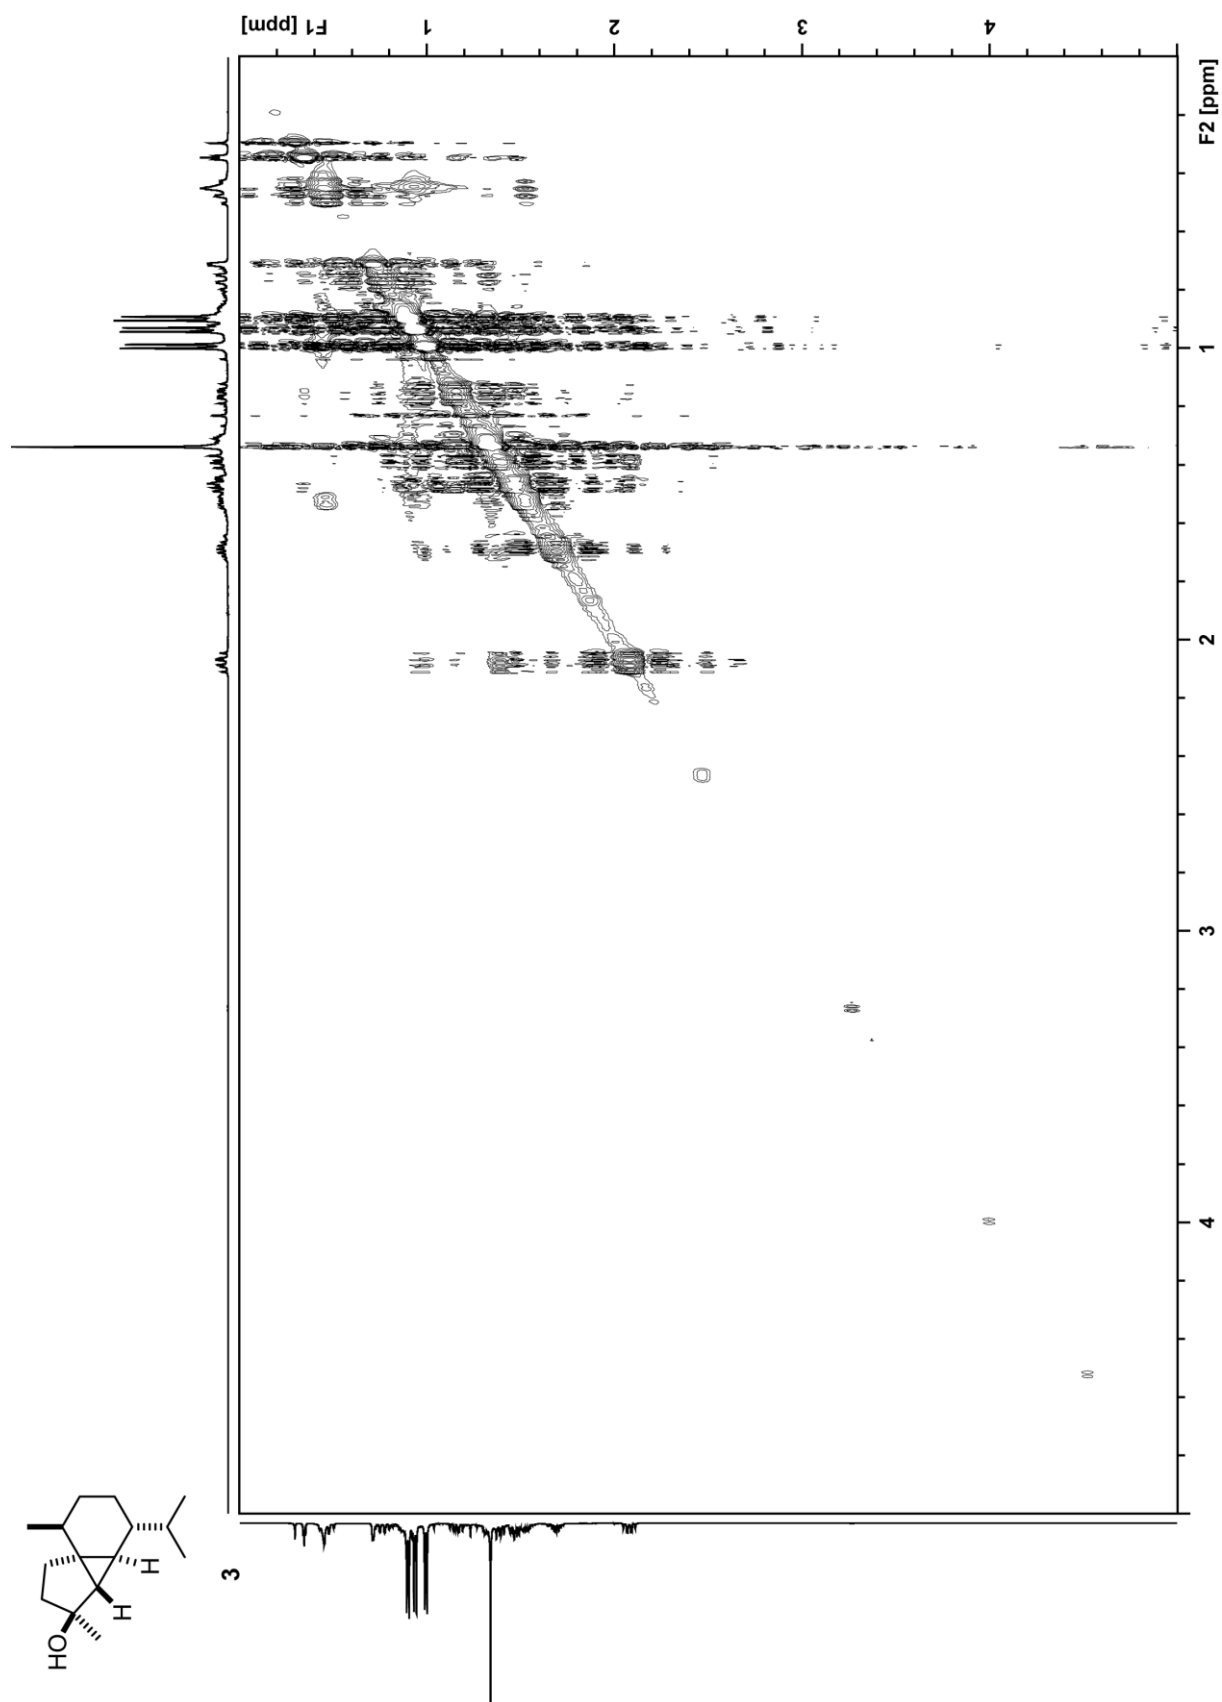

**Figure S22:** NOESY spectrum of **3**.

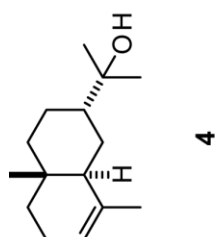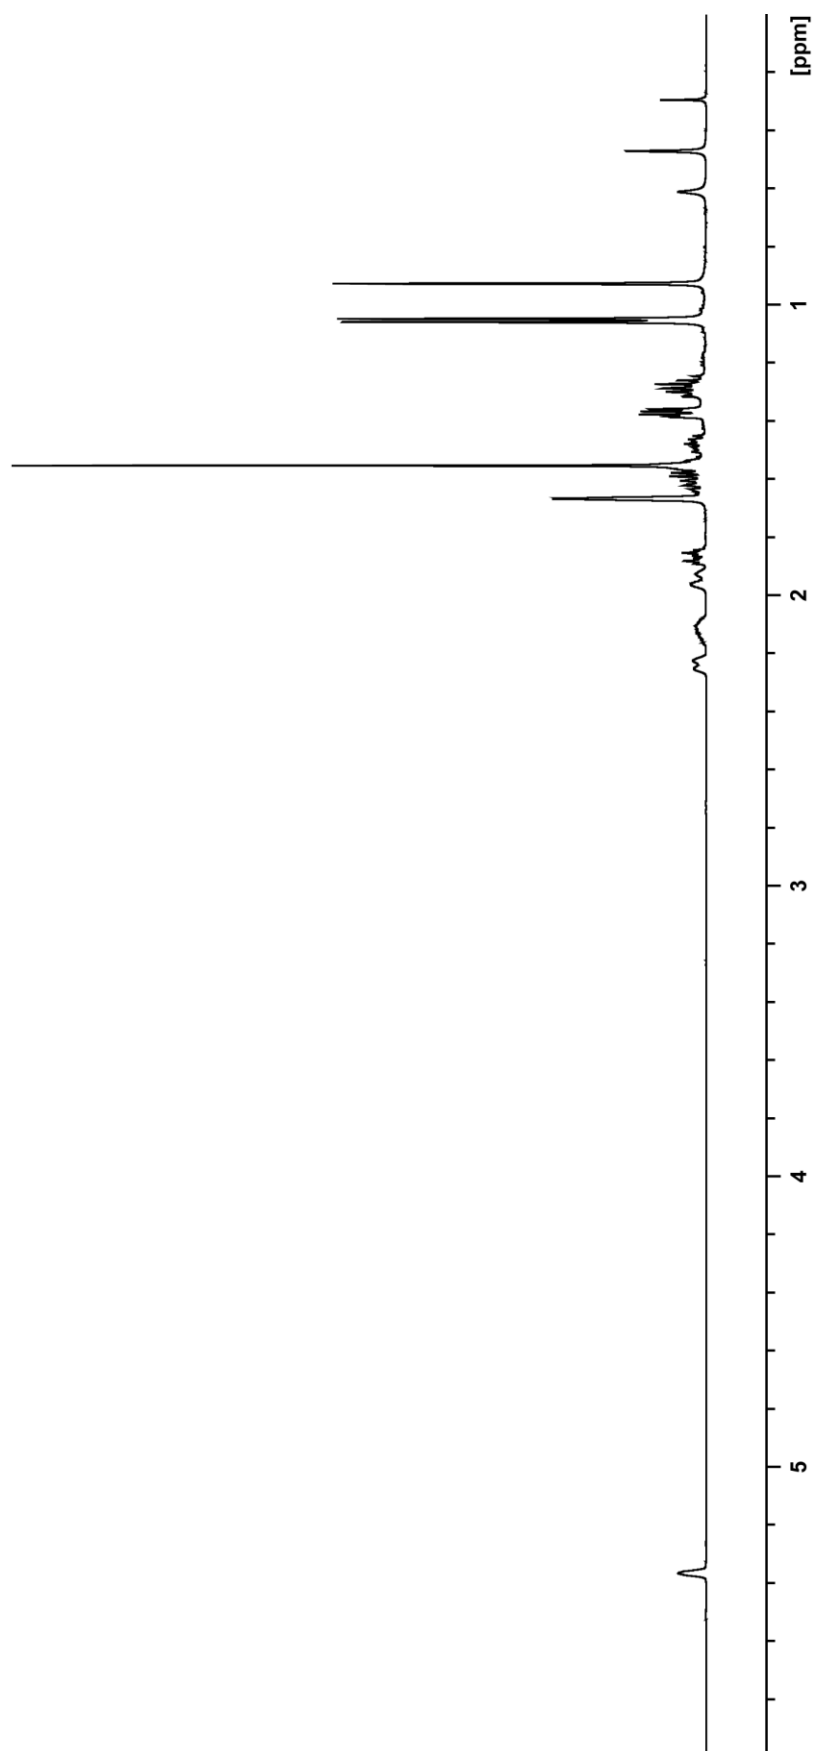

**Figure S23:**  $^1\text{H}$  NMR spectrum of **4** at 500 MHz.

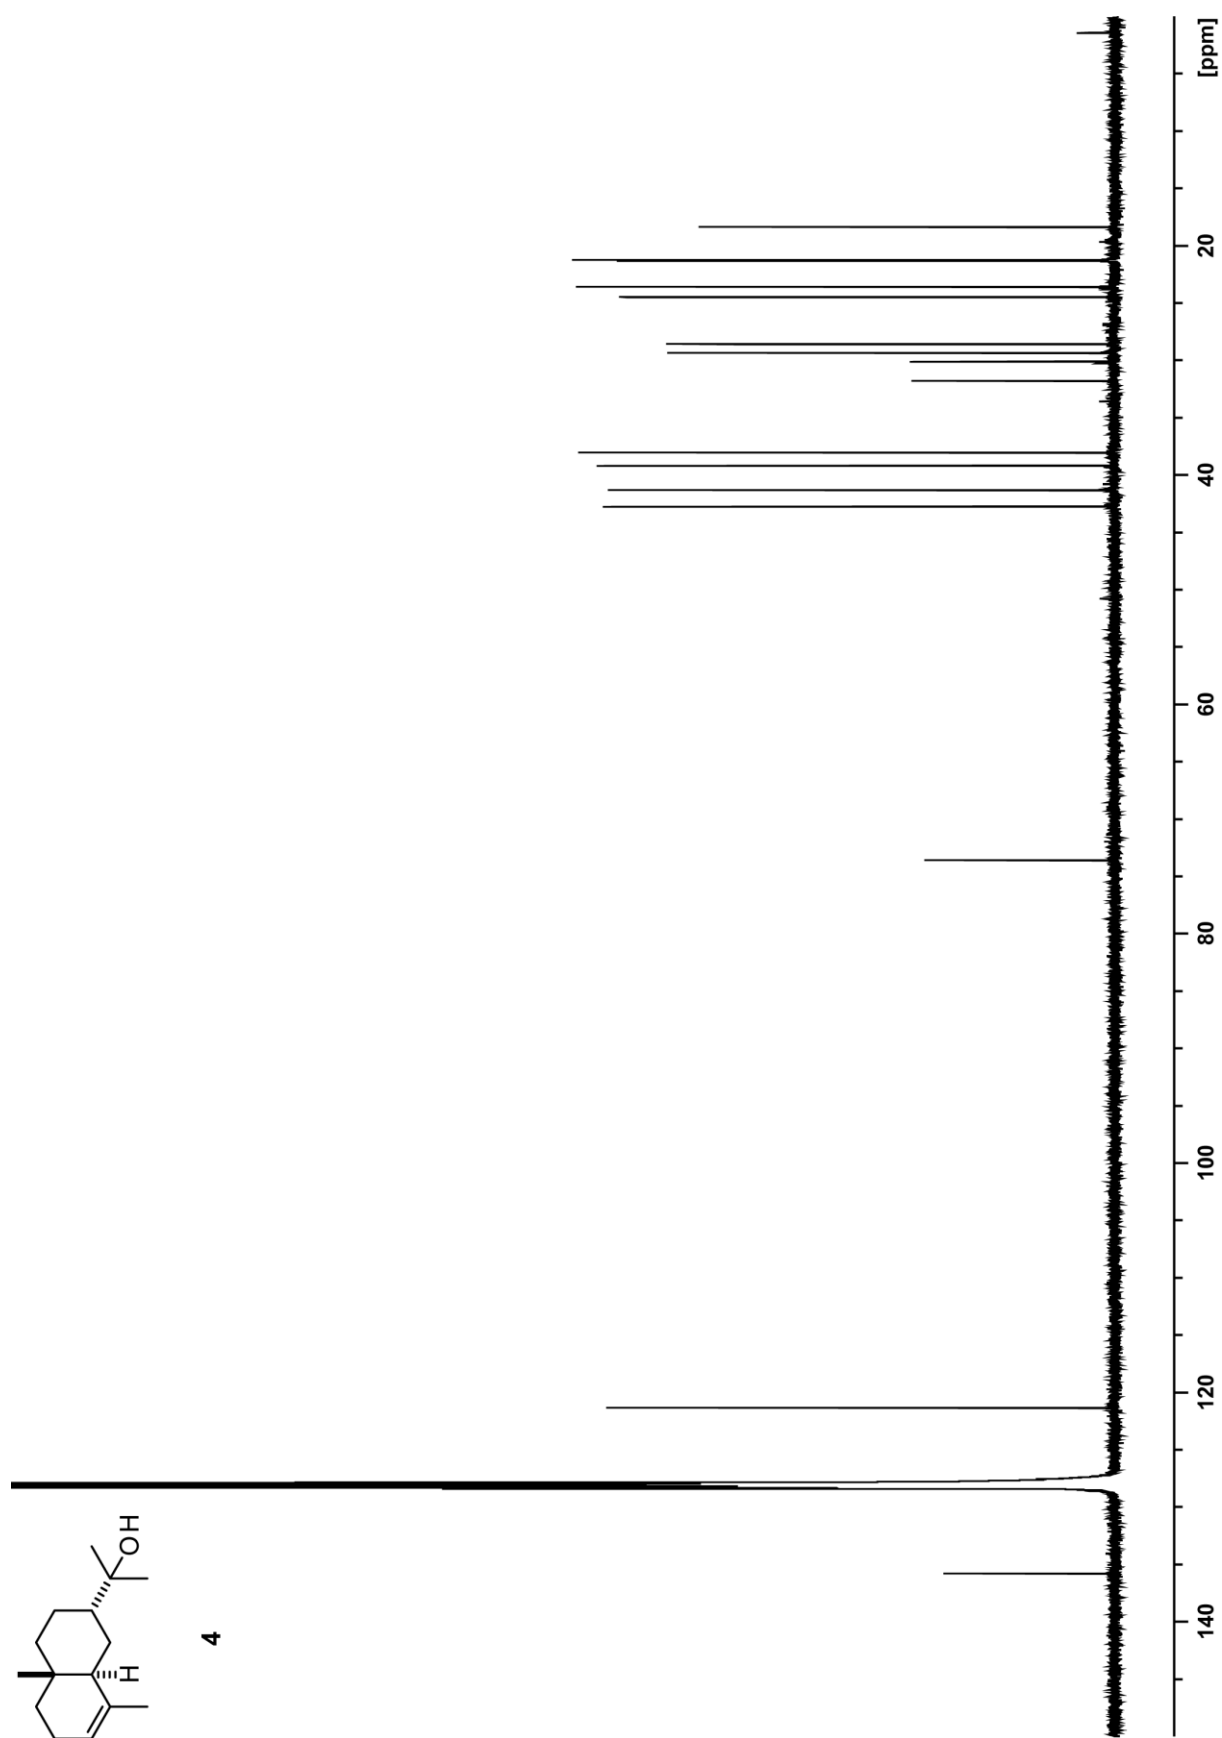

**Figure S24:**  $^{13}\text{C}$ -NMR spectrum of **4** at 125 MHz.

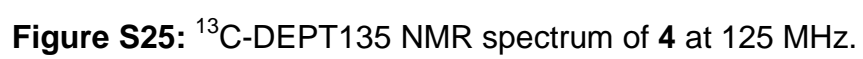

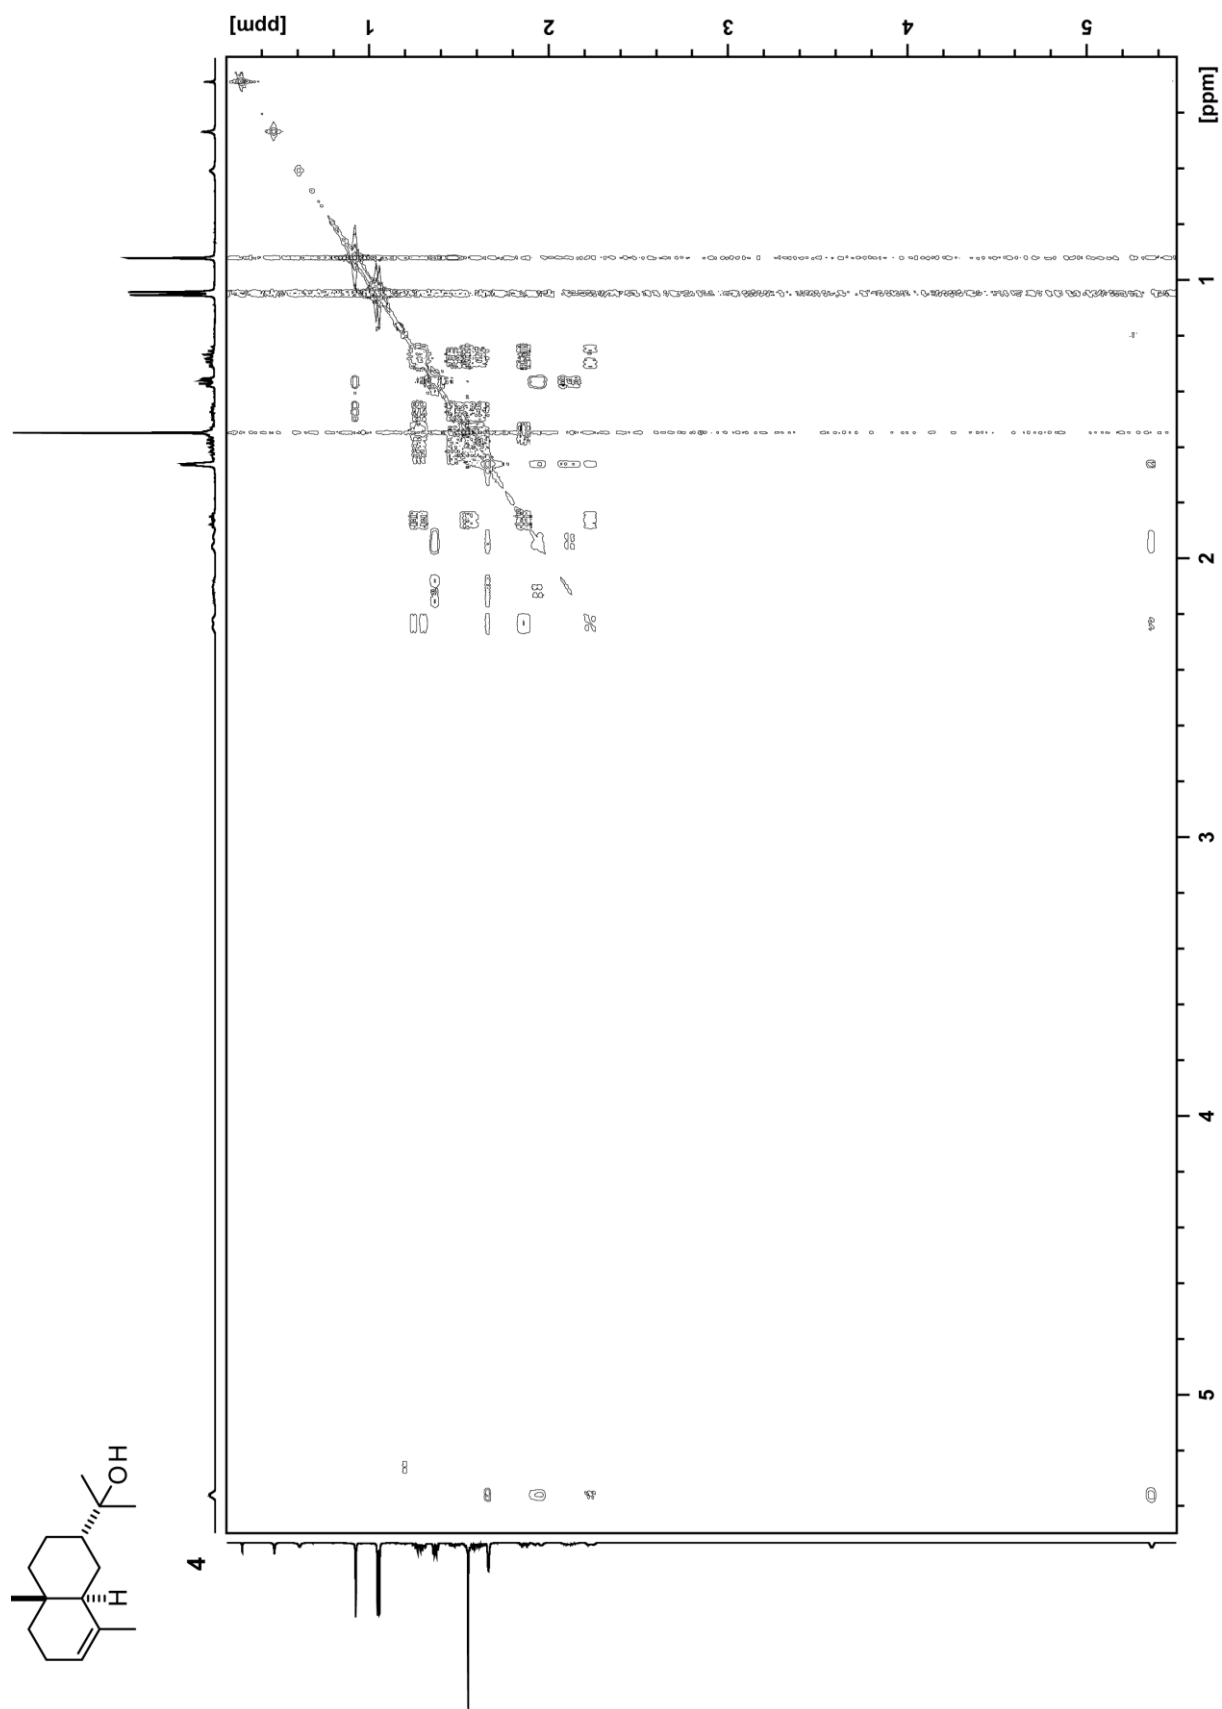

Figure S26:  $^1\text{H}$ ,  $^1\text{H}$ -COSY spectrum of 4.



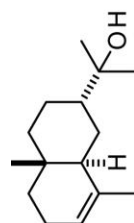

S31

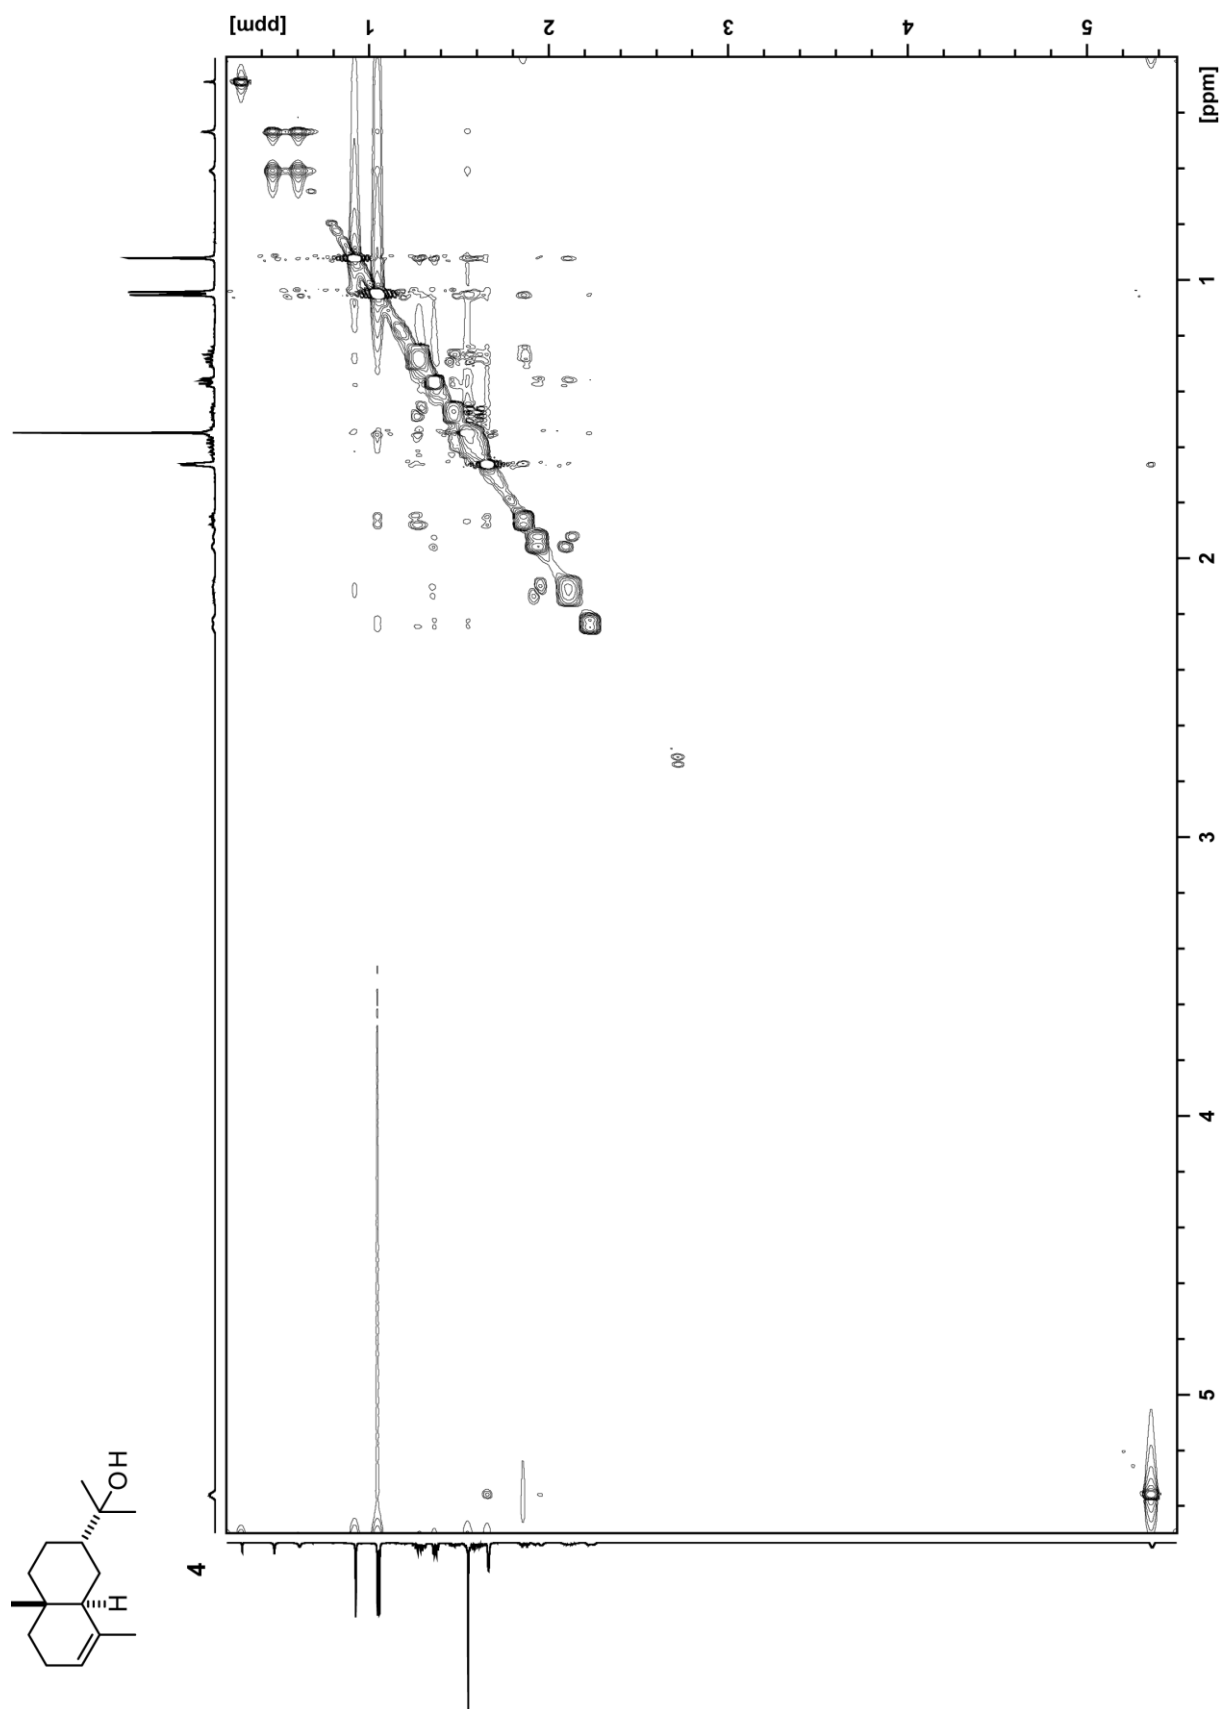

**Figure S29:** NOESY spectrum of **4**.



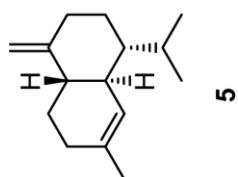

**Figure S30:**  $^1\text{H}$  NMR spectrum of **5** at 500 MHz.

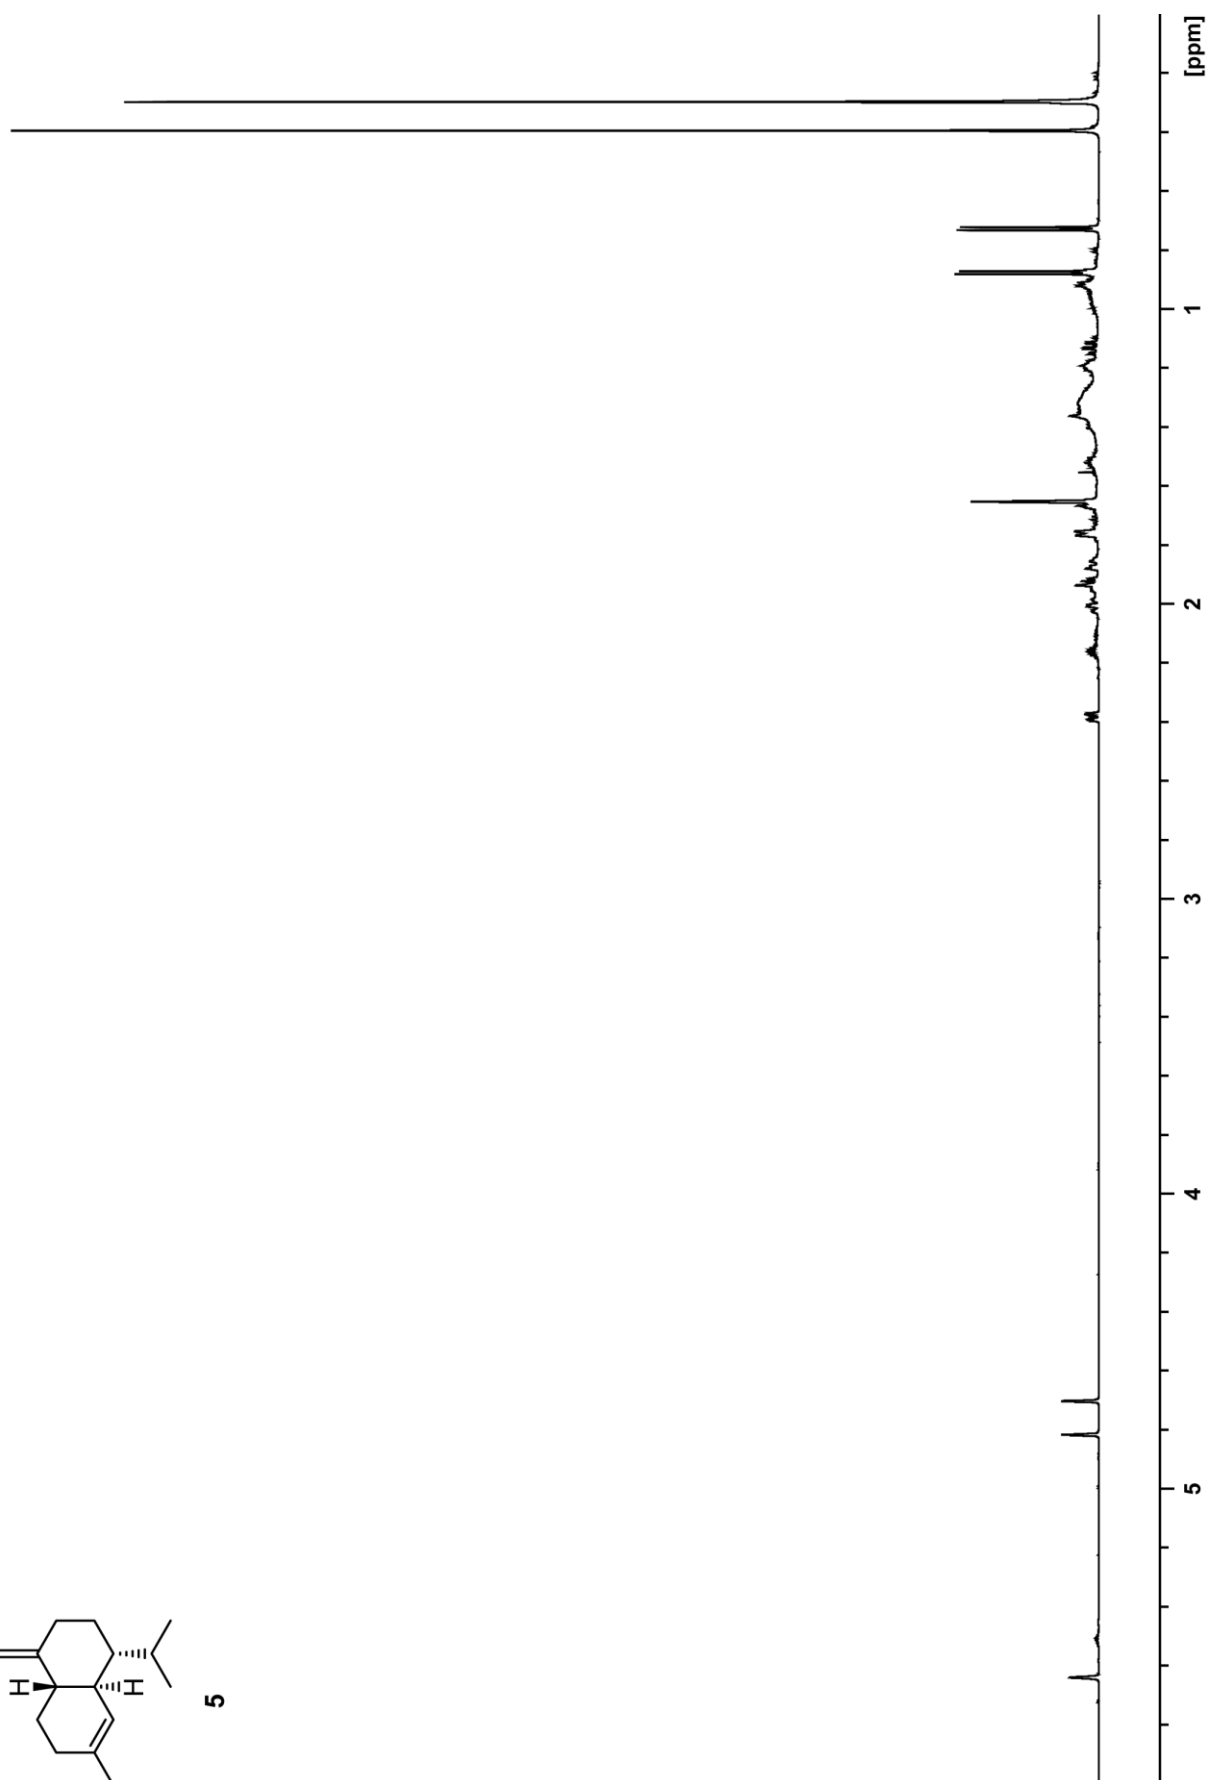

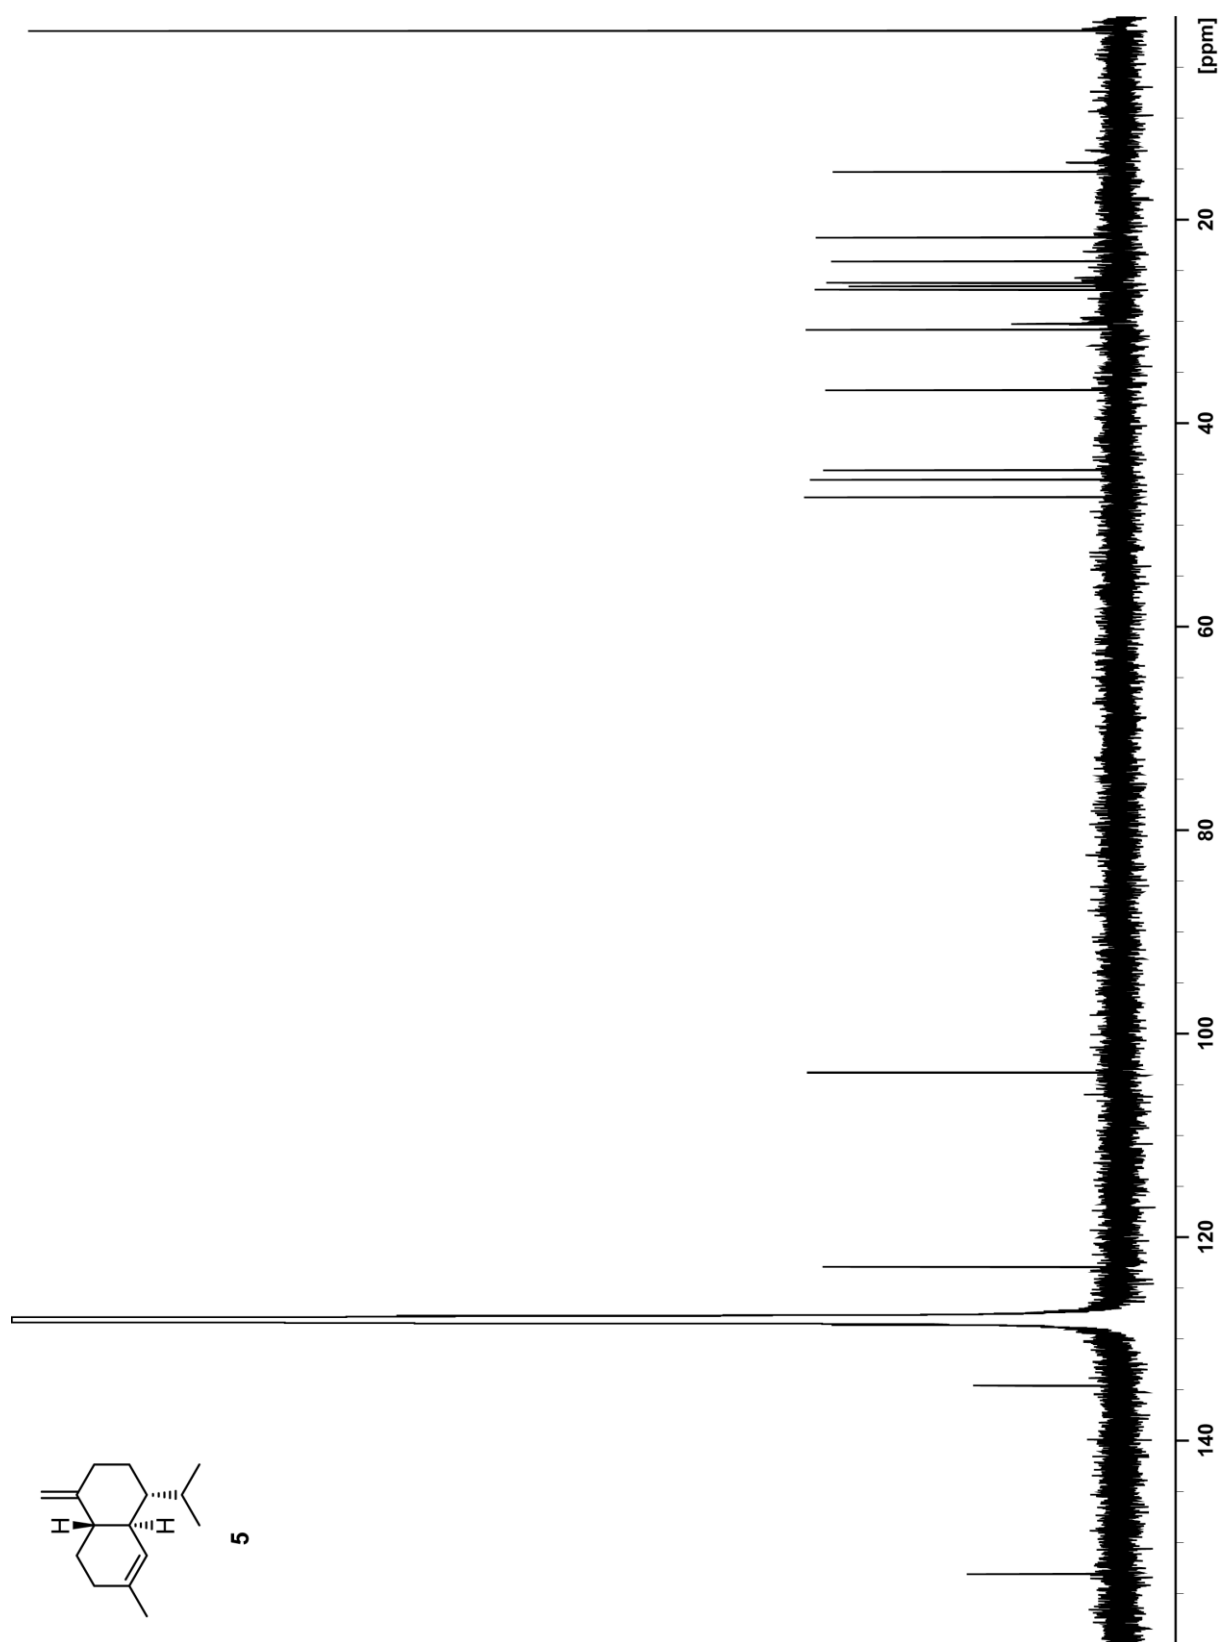

**Figure S31:**  $^{13}\text{C}$  NMR spectrum of **5** at 125 MHz.

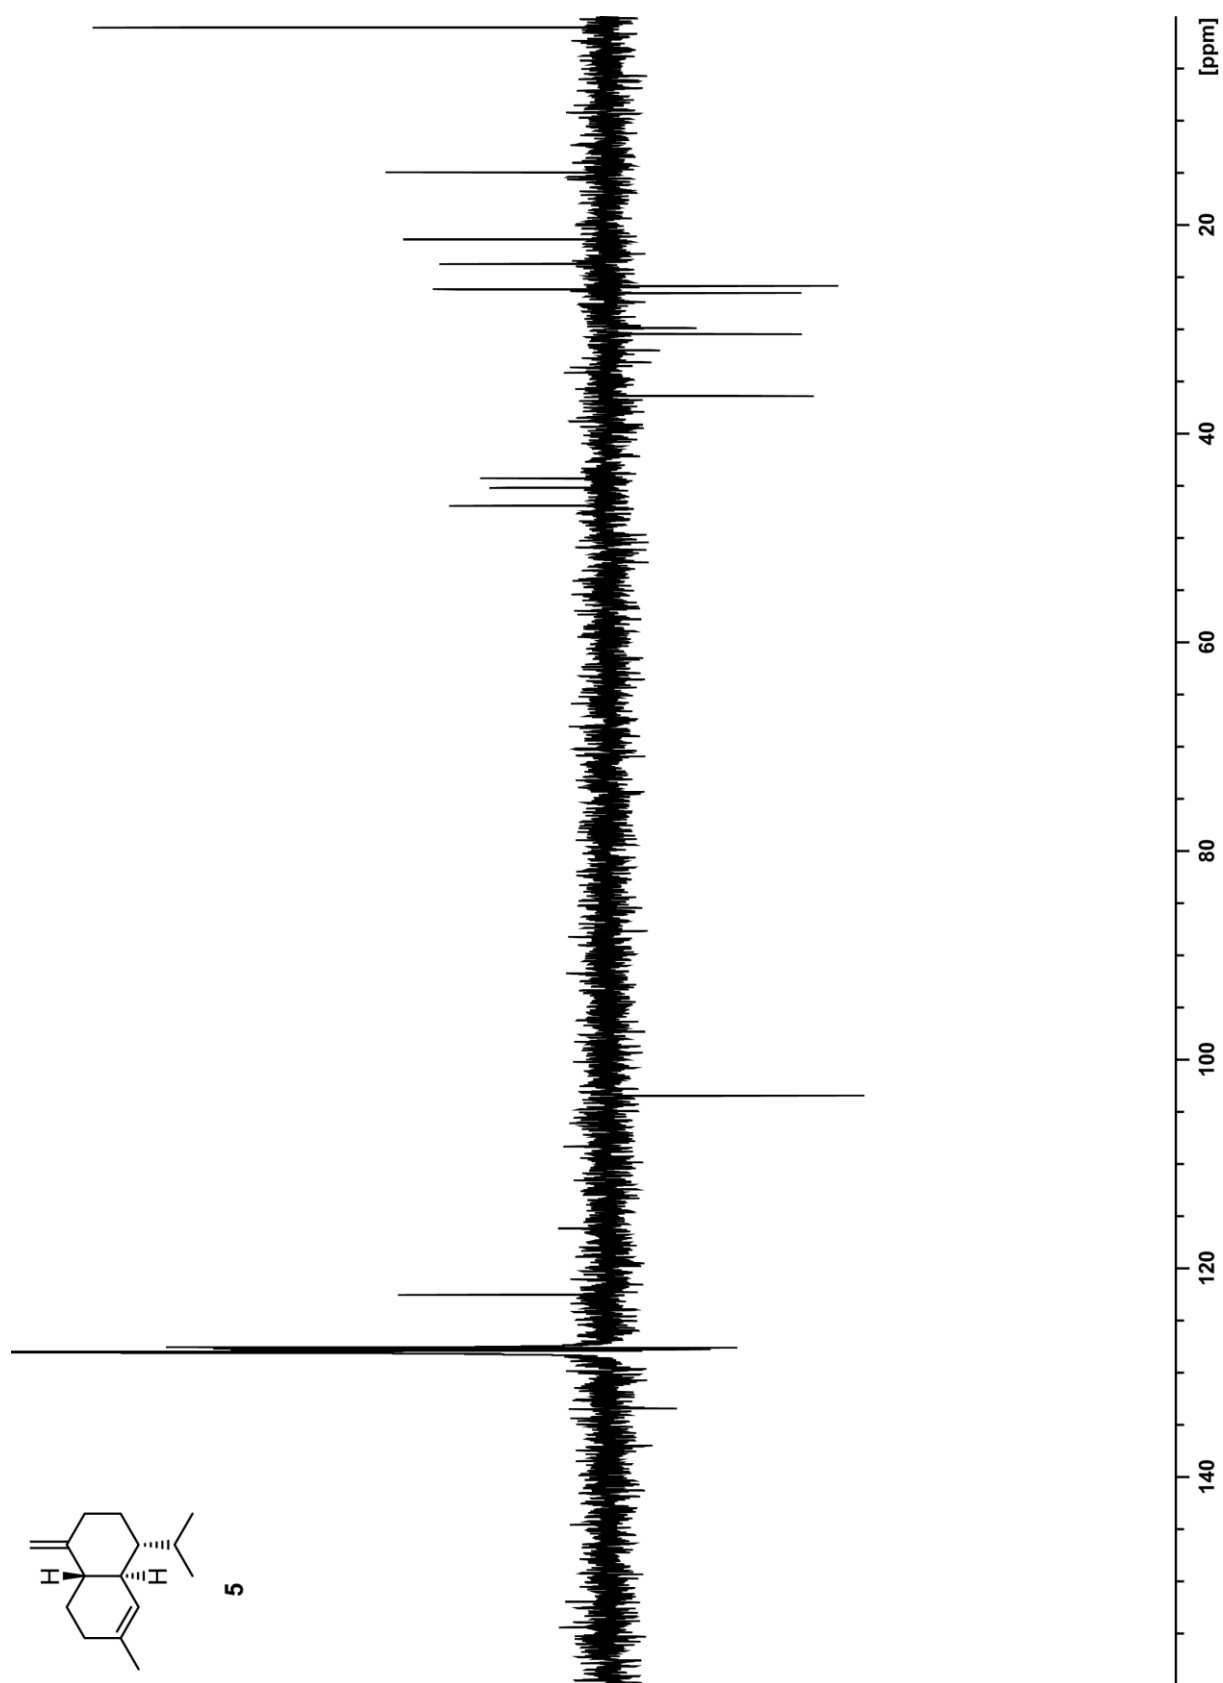

**Figure S32:**  $^{13}\text{C}$ -DEPT135 NMR spectrum of **5** at 125 MHz.

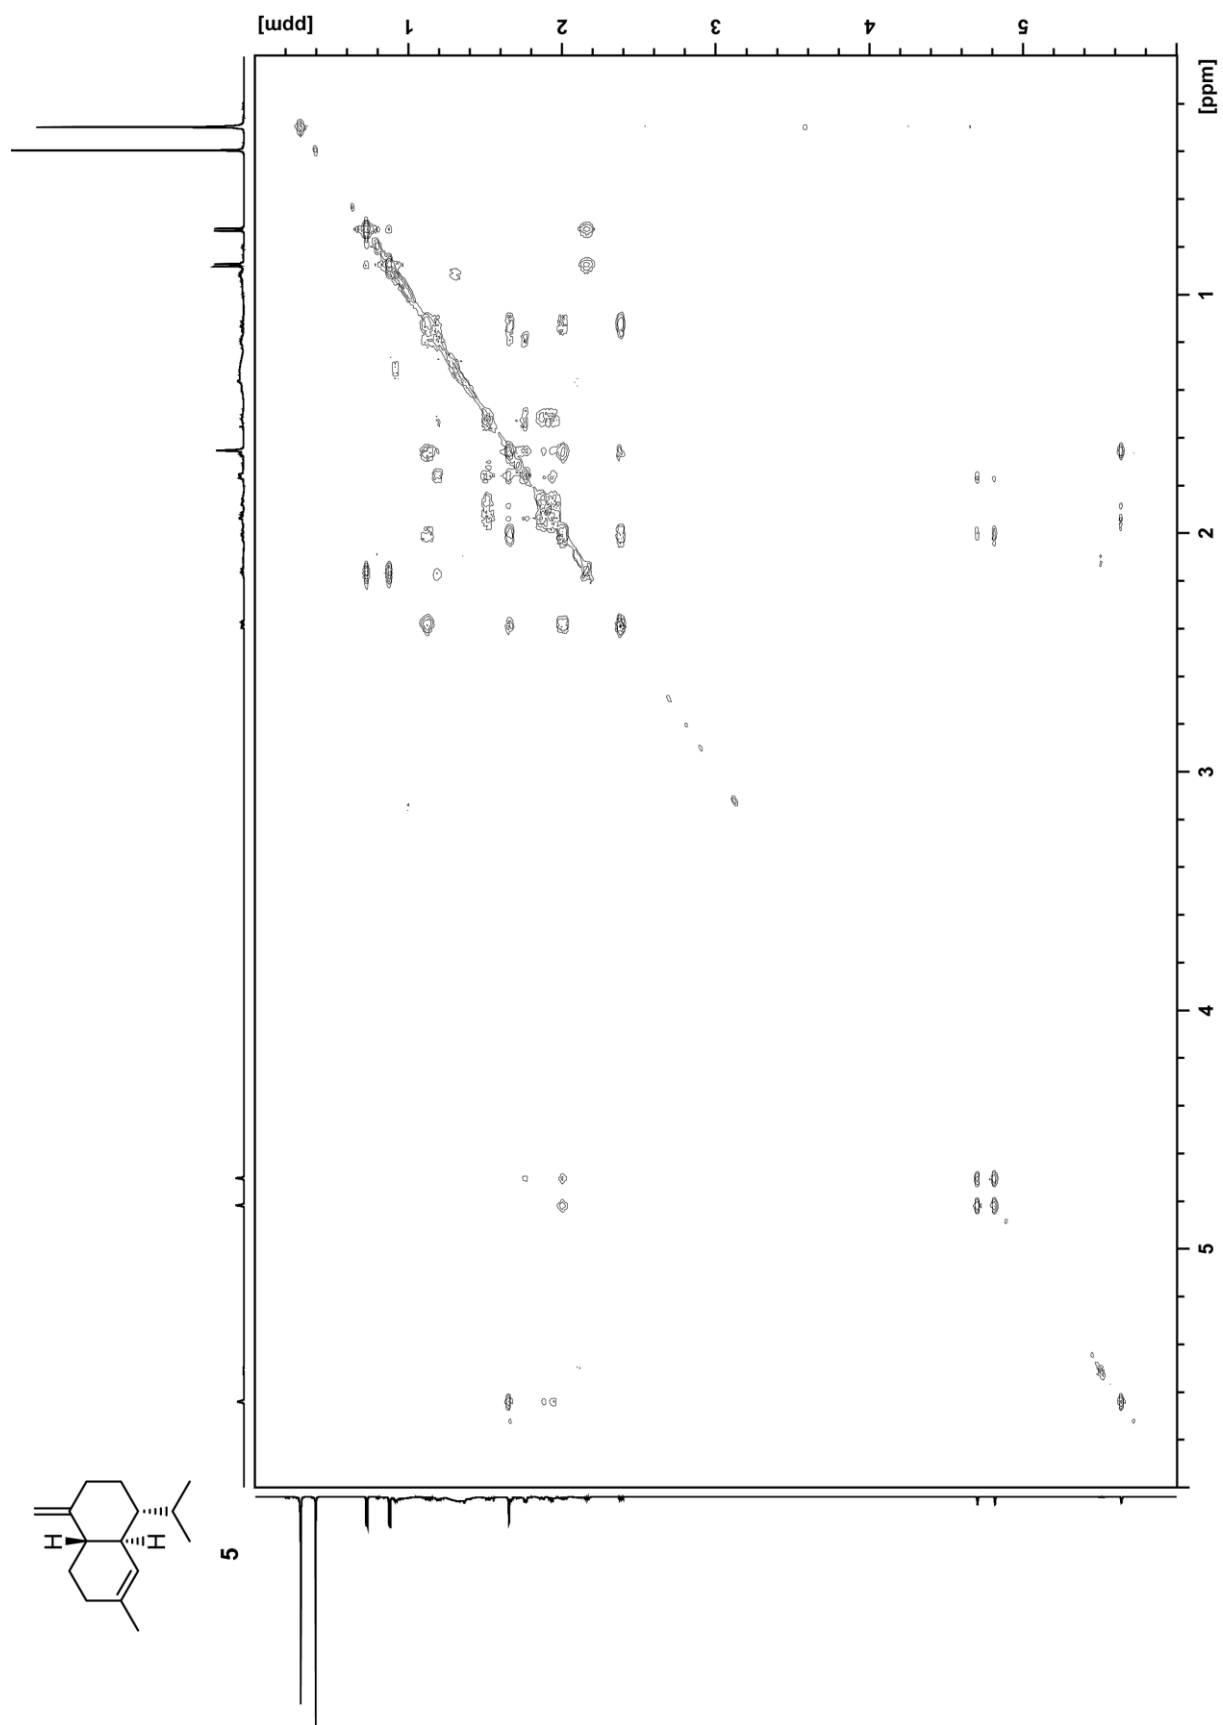

**Figure S33:**  $^1\text{H}$ ,  $^1\text{H}$ -COSY spectrum of **5**.

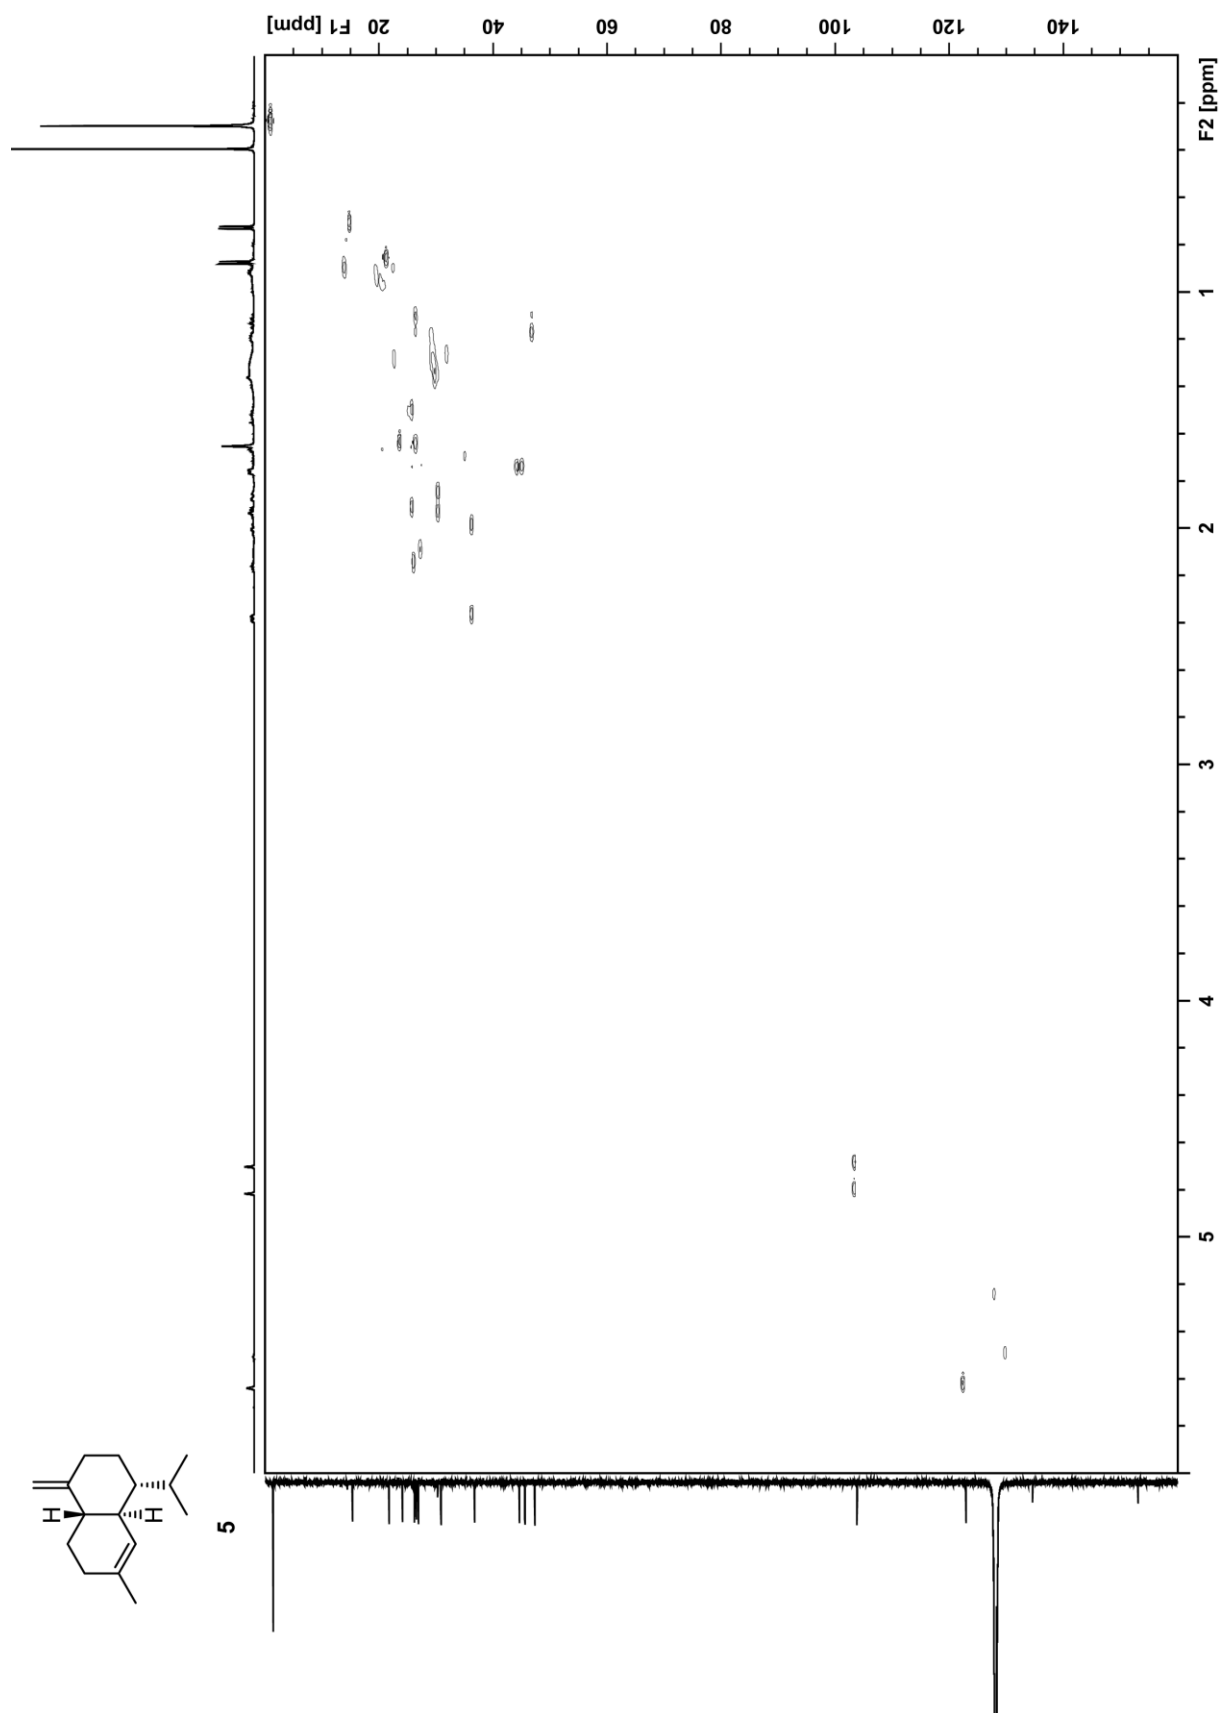

**Figure S34:** HSQC spectrum of **5**.

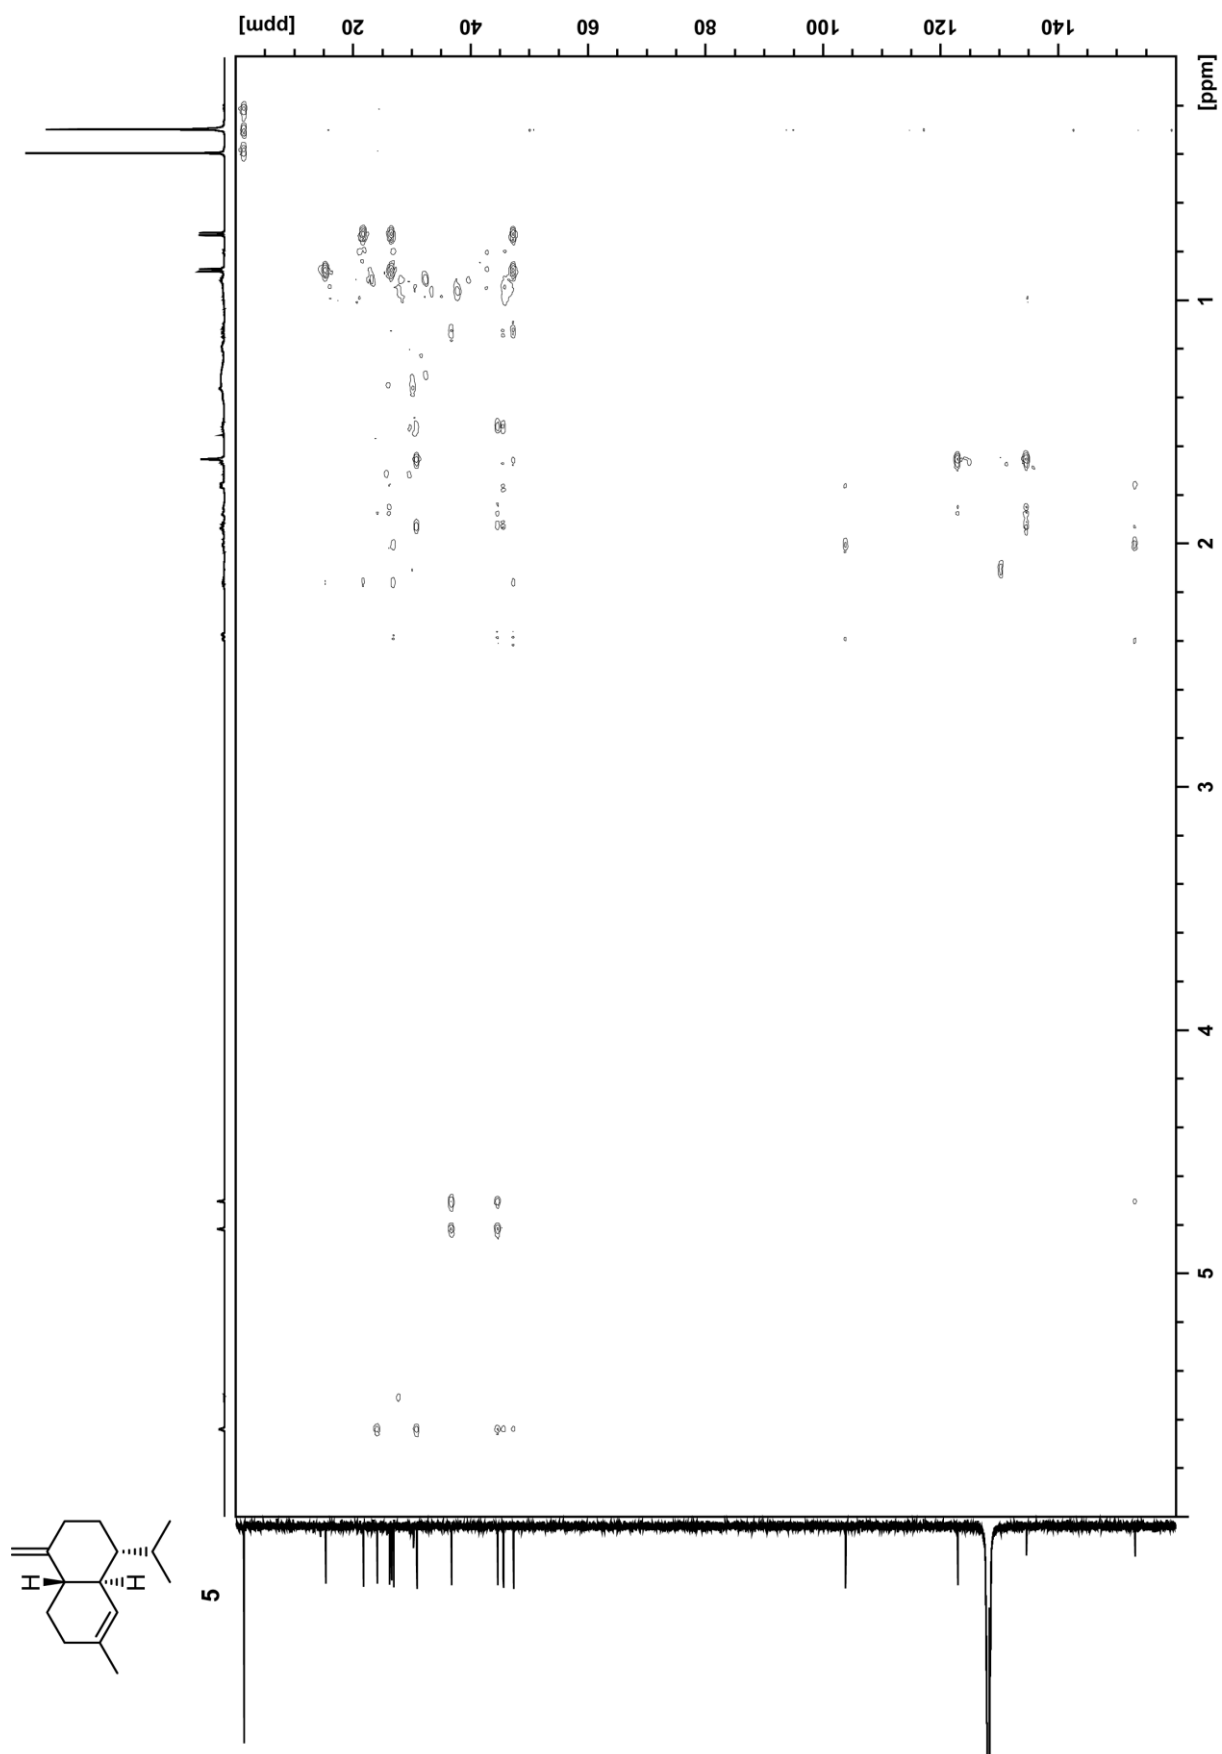

**Figure S35:** HMBC spectrum of **5**.

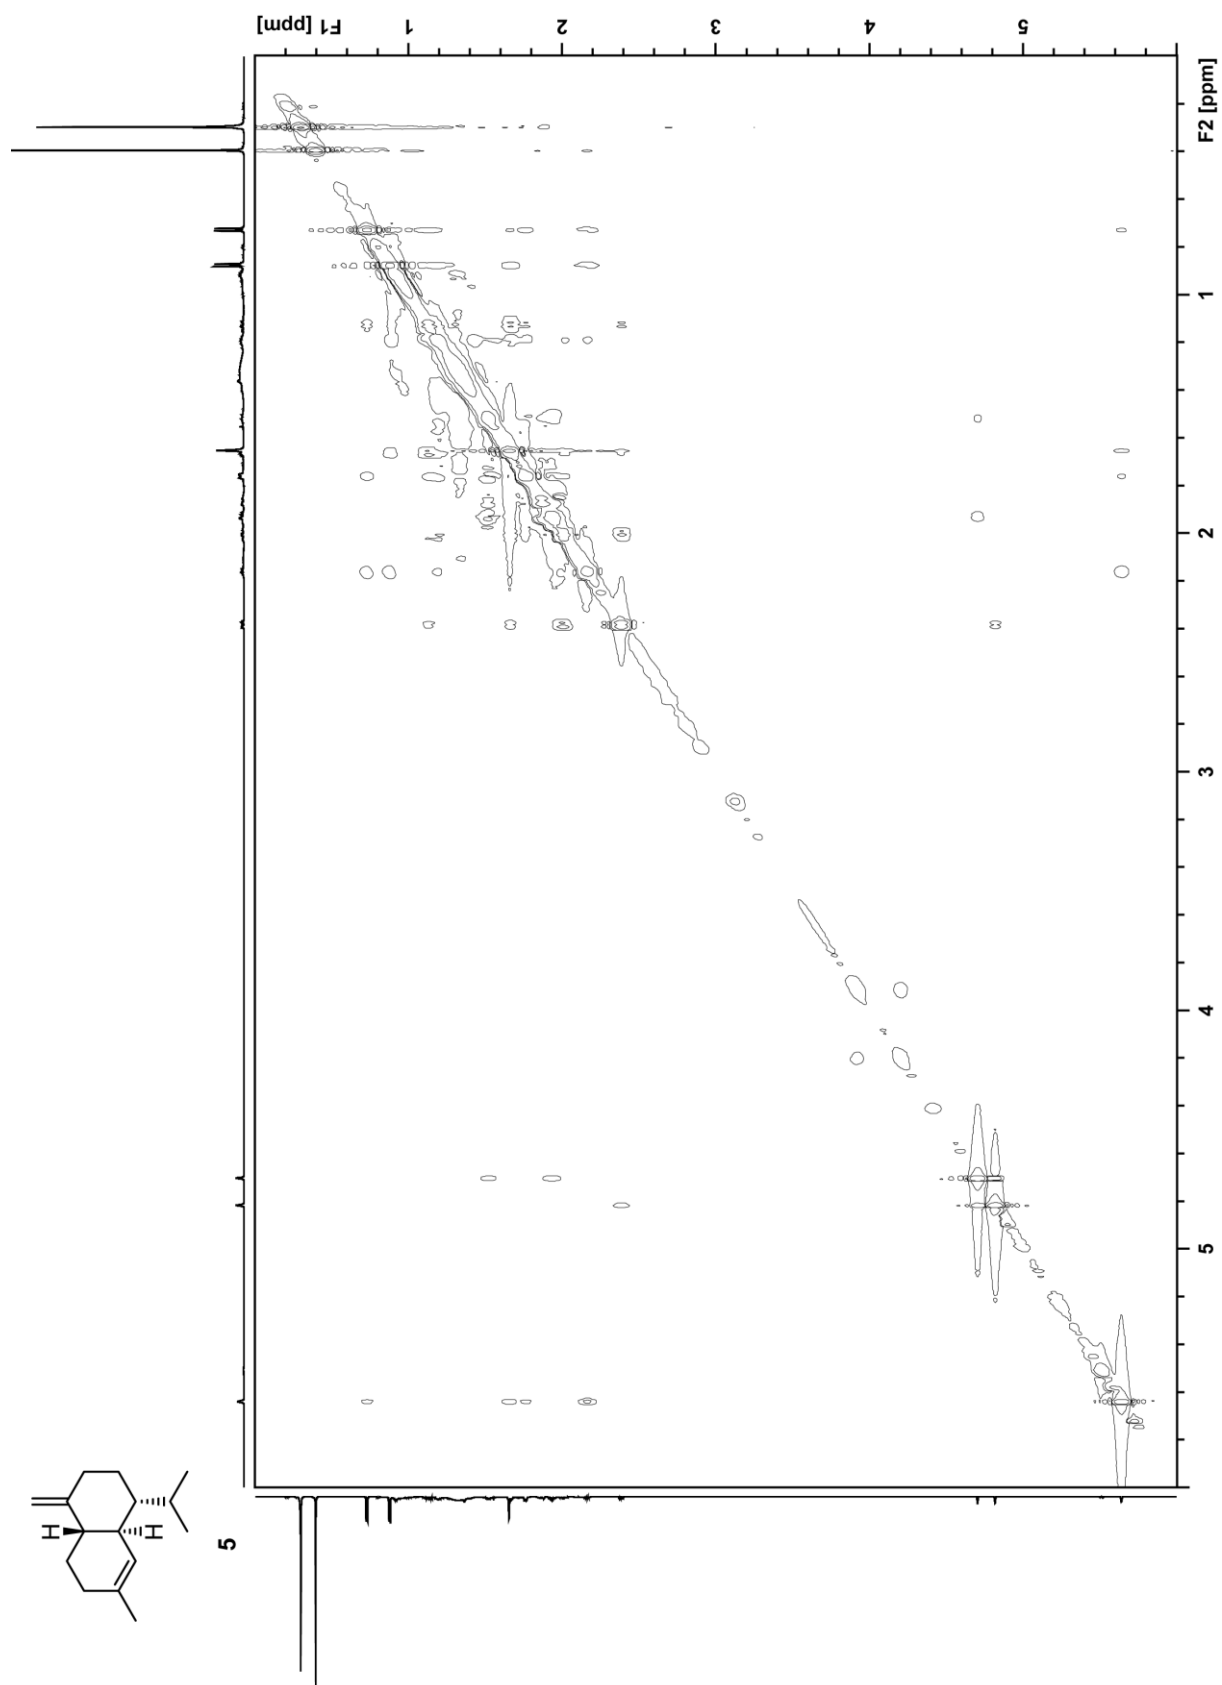

**Figure S36:** NOESY spectrum of **5**.
